# Supplementary material for: Phytochemical Study of Stem and Leaf of Clausena lansium
Source: PubMed Central journal article supplement (PMC6749519; doi:10.3390/molecules24173124), 2019-08-28
Supplement: molecules-24-03124-s001.pdf [file molecules-24-03124-s001.pdf]

# Supplementary Information

## Phytochemical Study of Stem and Leaf of *Clausena lansium*

Wenwen Peng<sup>1,2\*</sup>, Xiaoxiang Fu<sup>2</sup>, Yuyan Li<sup>2</sup>, Zhonghua Xiong<sup>2</sup>, Xugen Shi<sup>2</sup>, Fang Zhang<sup>2</sup>, and Baotong Li<sup>3\*</sup>

<sup>1</sup> Jiangxi Key Laboratory for Conservation and Utilization of Fungal Resources, Jiangxi Agricultural University, Nanchang 330045, China; pengwenwen123@sina.com (W.W.P.);

<sup>2</sup> College of Agriculture, Jiangxi Agricultural University, Nanchang 330045, China; xiaoxiangfu@jxau.edu.cn (X.X.F.); 845217104@qq.com (Y.Y.L.); 63701313@qq.com (Z.H.X.); 275507215@qq.com (X.G.S.)

<sup>3</sup> School of Land Resources and Environment, Jiangxi Agricultural University, Nanchang 330045, P.R. China; e-mail: libt66@163.com (B.T.L.);

\* Correspondence: pengwenwen123@sina.com (W.W.P.); libt66@163.com (B.T.L.).

## Contents

SI 1: <sup>1</sup>H-NMR spectrum of compound **1**.

SI 2: <sup>13</sup>C-NMR and DEPT spectrum of compound **1**.

SI 3: HSQC spectrum of compound **1**.

SI 4: <sup>1</sup>H-<sup>1</sup>H COSY spectrum of compound **1**.

SI 5: HMBC spectrum of compound **1**

SI 6: <sup>1</sup>H-NMR spectrum of compound **2**.

SI 7: <sup>13</sup>C-NMR and DEPT spectrum of compound **2**.

SI 8: <sup>1</sup>H-NMR spectrum of compound **3**.

SI 9: <sup>13</sup>C-NMR and DEPT spectrum of compound **3**.

SI 10:  $^1\text{H}$ -NMR spectrum of compound **4**.

SI 11:  $^{13}\text{C}$ -NMR and DEPT spectrum of compound **4**.

SI 12: HSQC spectrum of compound **4**.

SI 13:  $^1\text{H}$ - $^1\text{H}$  COSY spectrum of compound **4**.

SI 14: HMBC spectrum of compound **4**

SI 15:  $^1\text{H}$ -NMR spectrum of compound **5**.

SI 16:  $^{13}\text{C}$ -NMR and DEPT spectrum of compound **5**.

SI 17:  $^1\text{H}$ -NMR spectrum of compound **6**.

SI 18:  $^{13}\text{C}$ -NMR and DEPT spectrum of compound **6**.

SI 19: HSQC spectrum of compound **6**.

SI 20:  $^1\text{H}$ - $^1\text{H}$  COSY spectrum of compound **6**.

SI 21: HMBC spectrum of compound **6**

SI 22:  $^1\text{H}$ -NMR spectrum of compound **7**.

SI 23:  $^{13}\text{C}$ -NMR and DEPT spectrum of compound **7**.

SI 24: HSQC spectrum of compound **7**.

SI 25:  $^1\text{H}$ - $^1\text{H}$  COSY spectrum of compound **7**.

SI 26: HMBC spectrum of compound **7**

SI 27:  $^1\text{H}$ -NMR spectrum of compound **8**.

SI 28:  $^{13}\text{C}$ -NMR and DEPT spectrum of compound **8**.

SI 29:  $^1\text{H}$ -NMR spectrum of compound **9**.

SI 30:  $^{13}\text{C}$ -NMR and DEPT spectrum of compound **9**.

SI 31: HSQC spectrum of compound **9**.

SI 32:  $^1\text{H}$ - $^1\text{H}$  COSY spectrum of compound **9**.

SI 33: HMBC spectrum of compound **9**.

SI 34:  $^1\text{H}$ -NMR spectrum of compound **10**.

SI 35:  $^{13}\text{C}$ -NMR and DEPT spectrum of compound **10**.

SI 36:  $^1\text{H}$ -NMR spectrum of compound **11**.

SI 37:  $^{13}\text{C}$ -NMR and DEPT spectrum of compound **11**.

SI 38:  $^1\text{H}$ -NMR spectrum of compound **12**.

SI 39:  $^{13}\text{C}$ -NMR and DEPT spectrum of compound **12**.

SI 40: HSQC spectrum of compound **12**.

SI 41:  $^1\text{H}$ - $^1\text{H}$  COSY spectrum of compound **12**.

SI 42: HMBC spectrum of compound **12**.

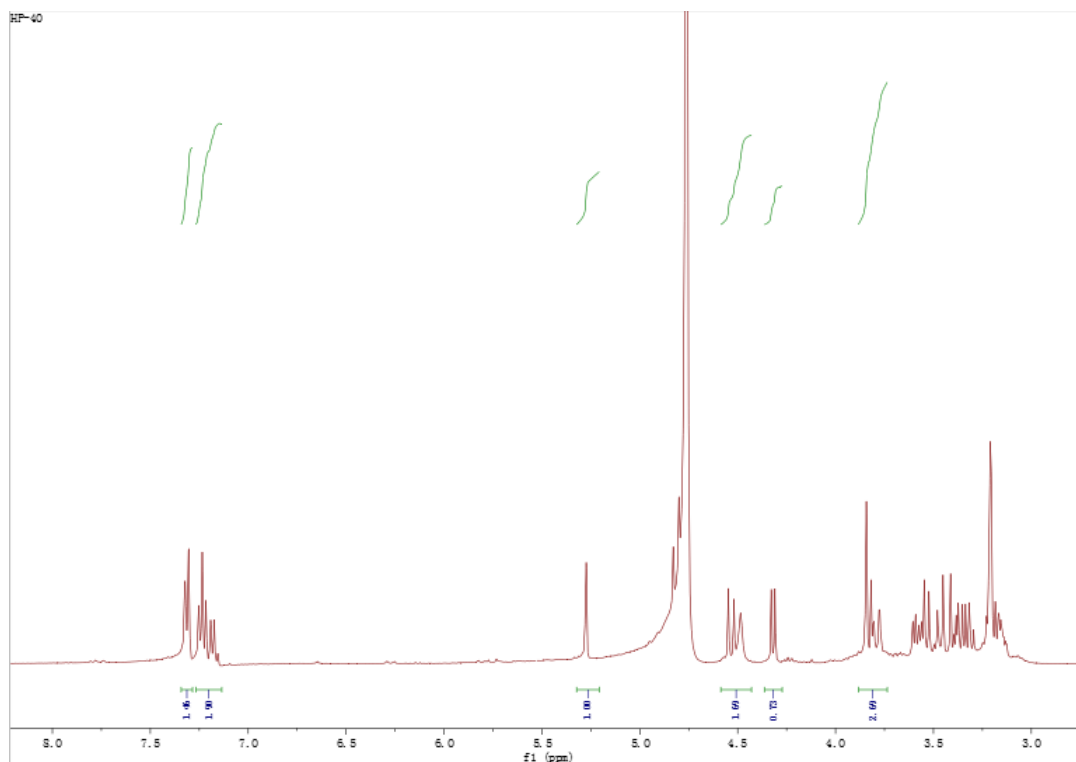

SI 1:  $^1\text{H}$ -NMR spectrum of compound **1**.

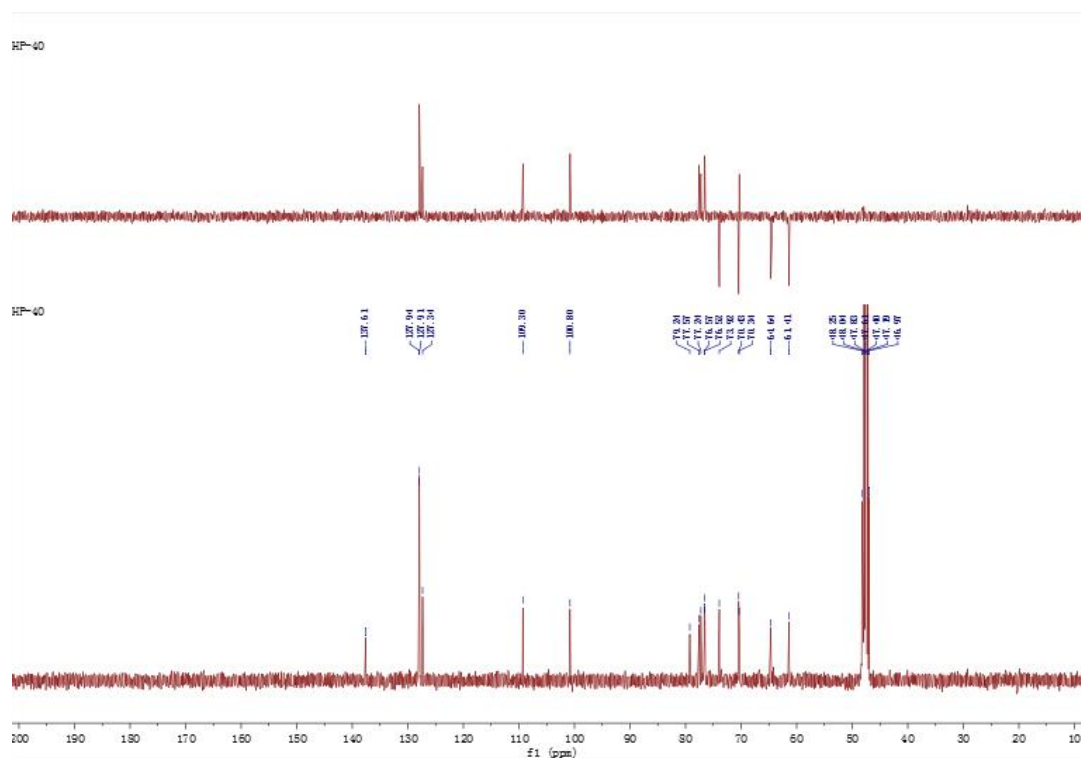

SI 2:  $^{13}\text{C}$ -NMR and DEPT spectrum of compound **1**.

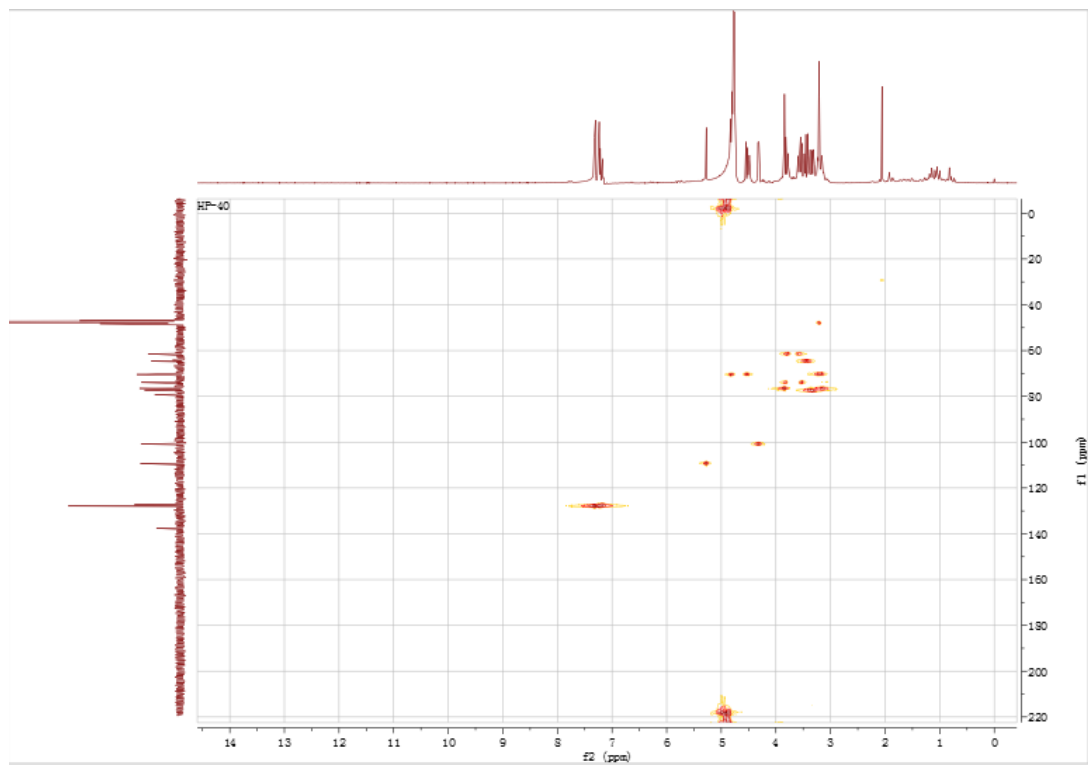

SI 3: HSQC spectrum of compound **1**.

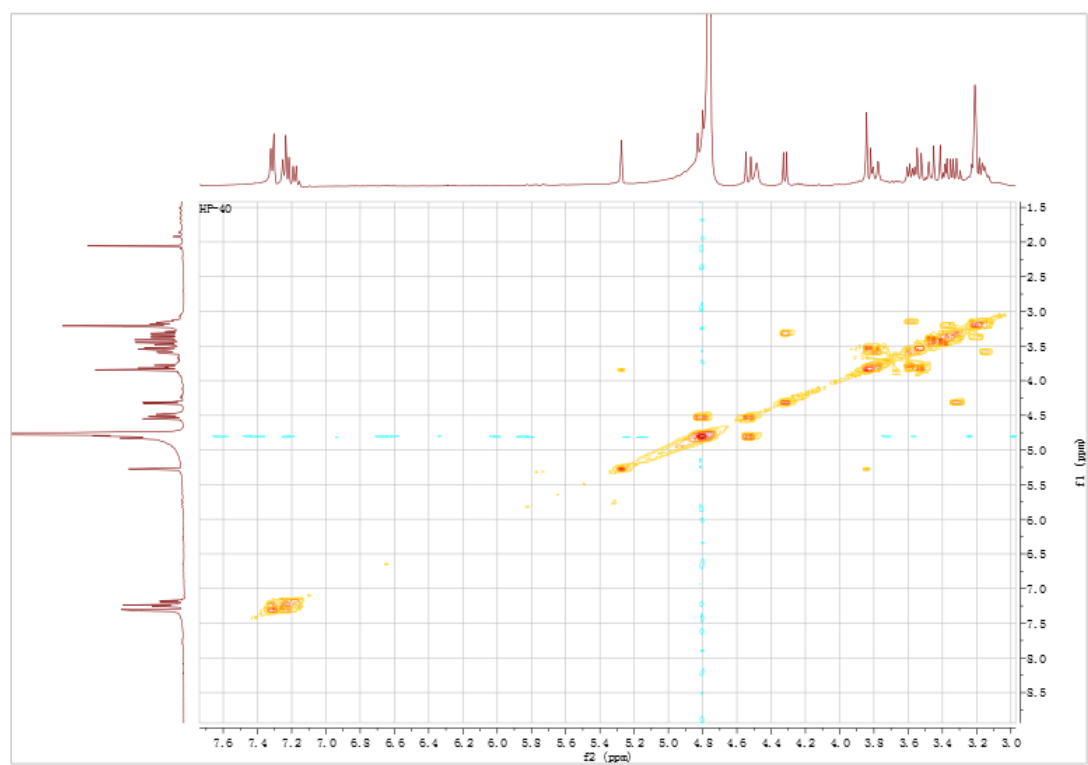

SI 4:  $^1\text{H}$ - $^1\text{H}$  COSY spectrum of compound **1**.

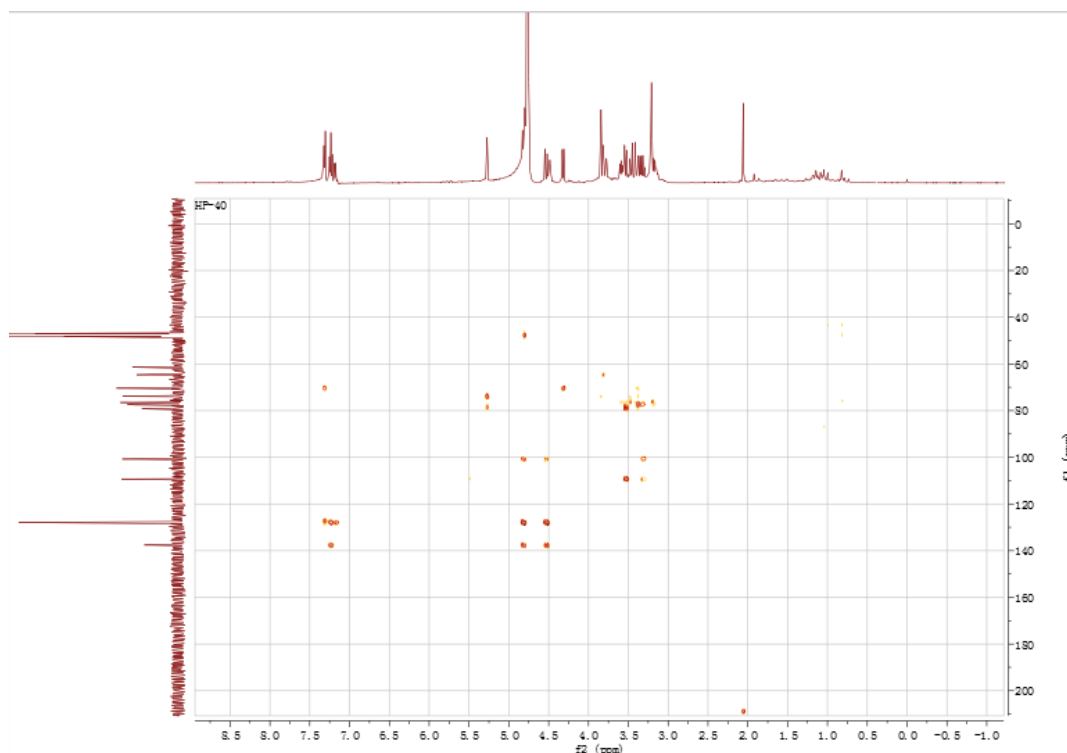

SI 5: HMBC spectrum of compound **1**

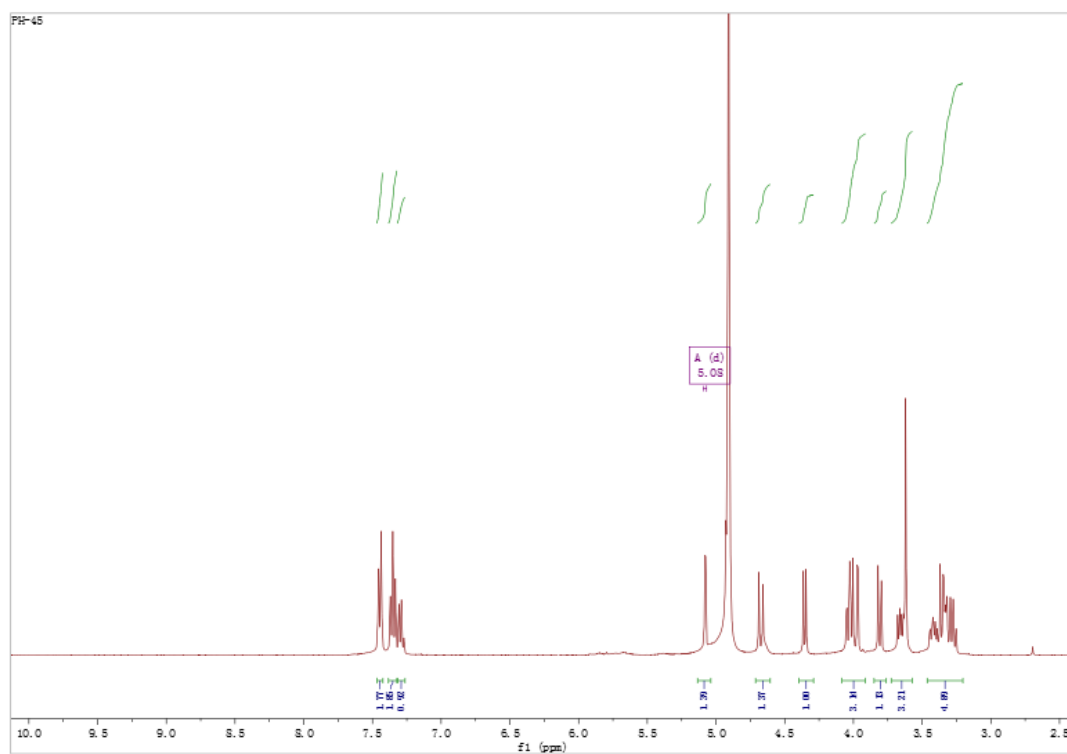

SI 6:  $^1\text{H}$ -NMR spectrum of compound **2**.

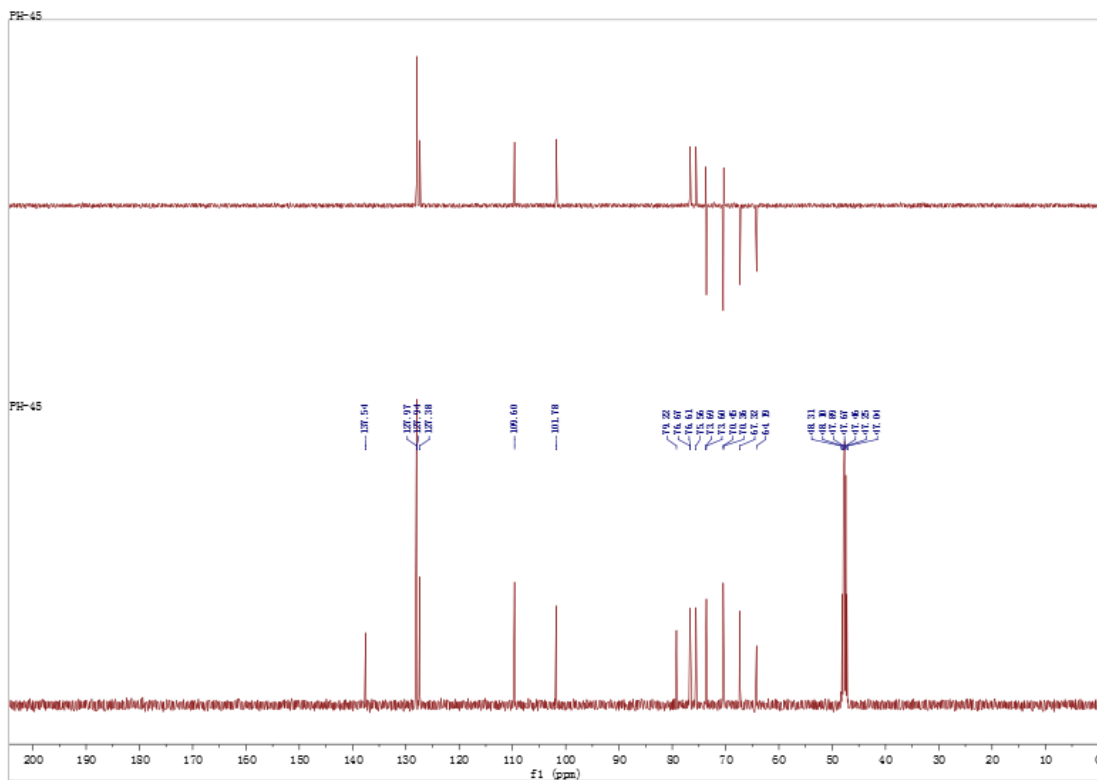

SI 7:  $^{13}\text{C}$ -NMR and DEPT spectrum of compound 2.

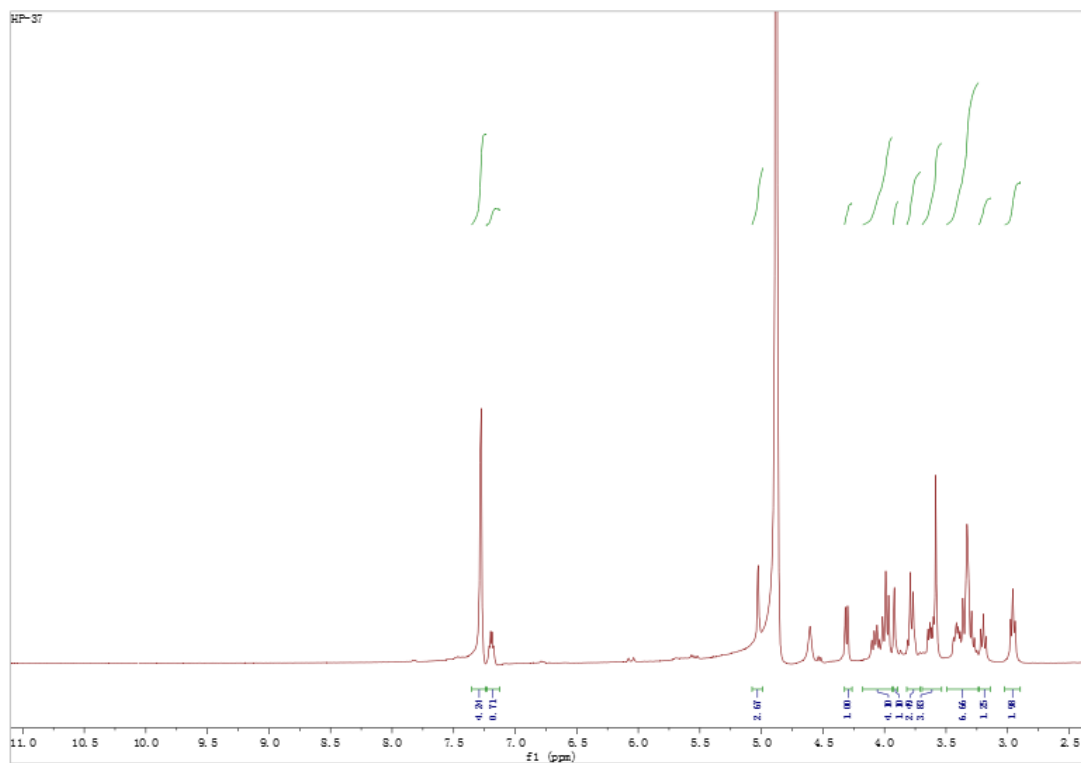

SI 8:  $^1\text{H}$ -NMR spectrum of compound 3.

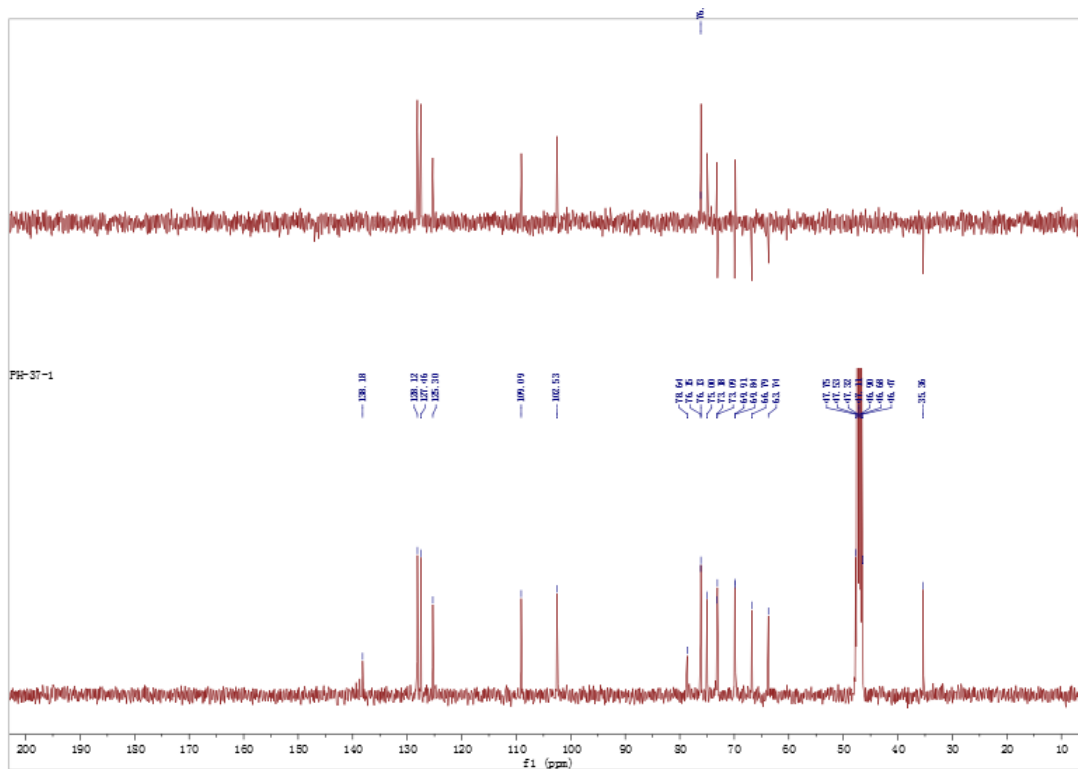

SI 9:  $^{13}\text{C}$ -NMR and DEPT spectrum of compound **3**.

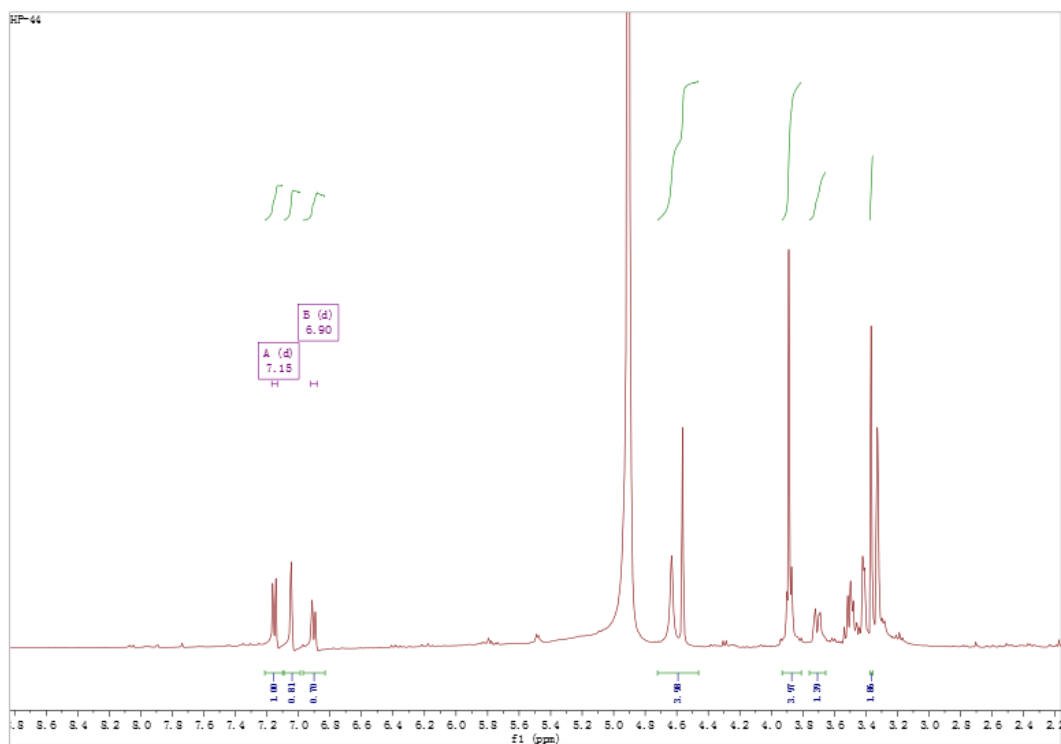

SI 10:  $^1\text{H}$ -NMR spectrum of compound **4**.



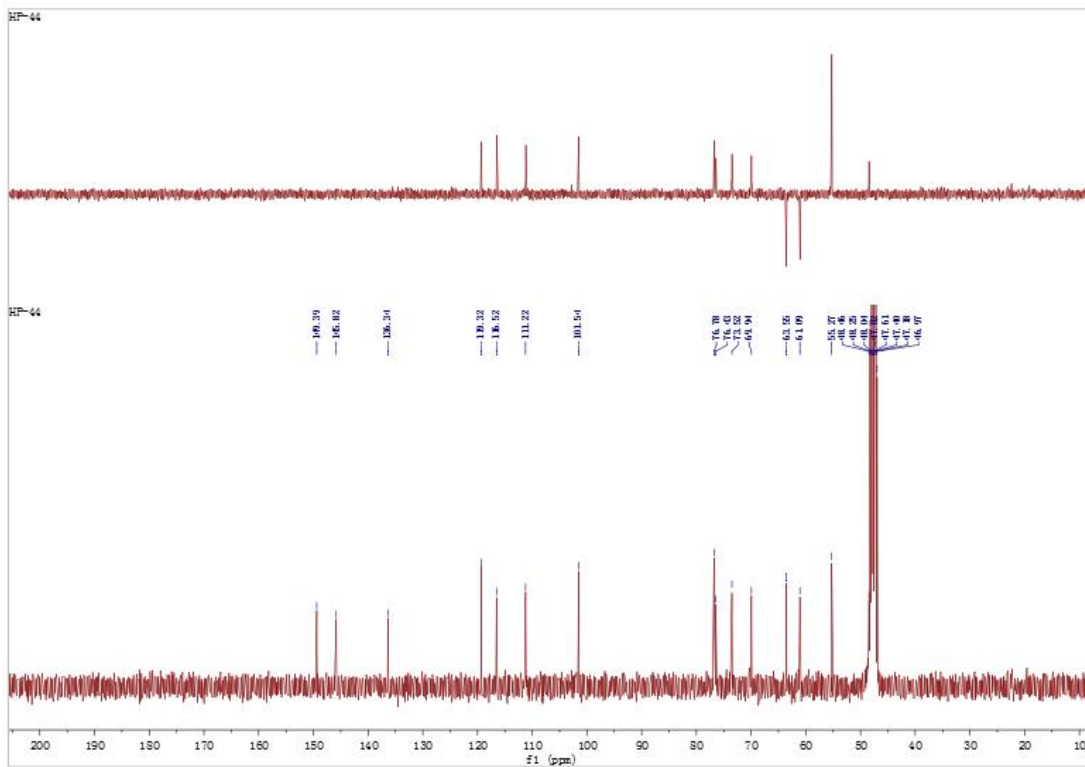

SI 11:  $^{13}\text{C}$ -NMR and DEPT spectrum of compound 4.

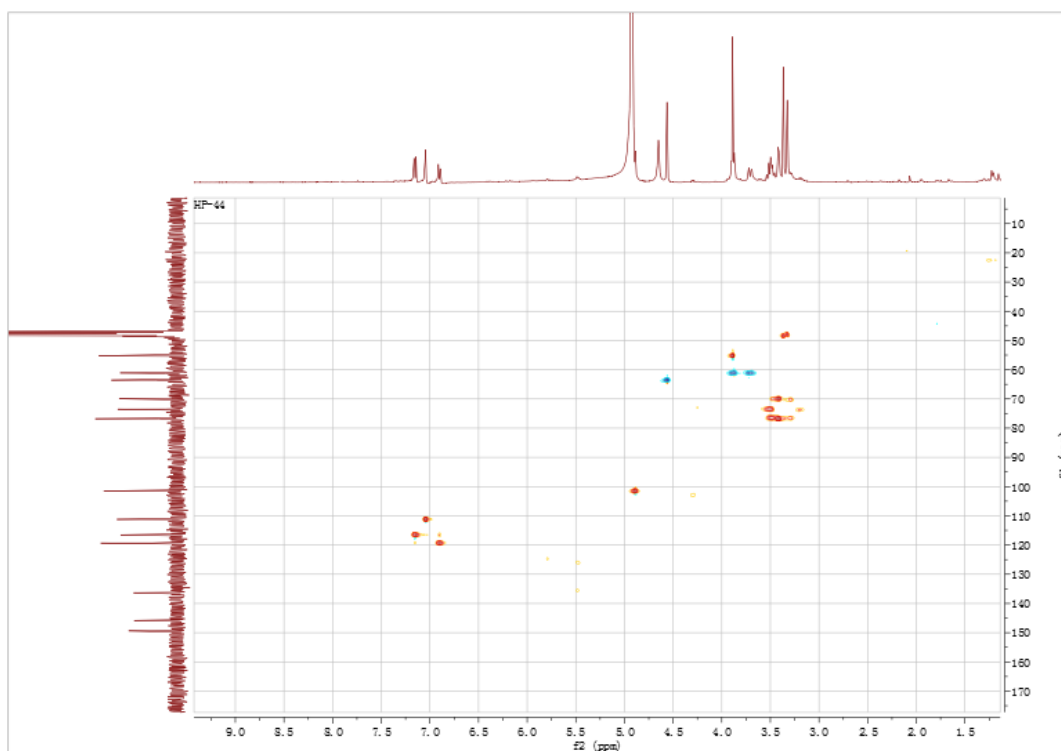

SI 12: HSQC spectrum of compound 4.

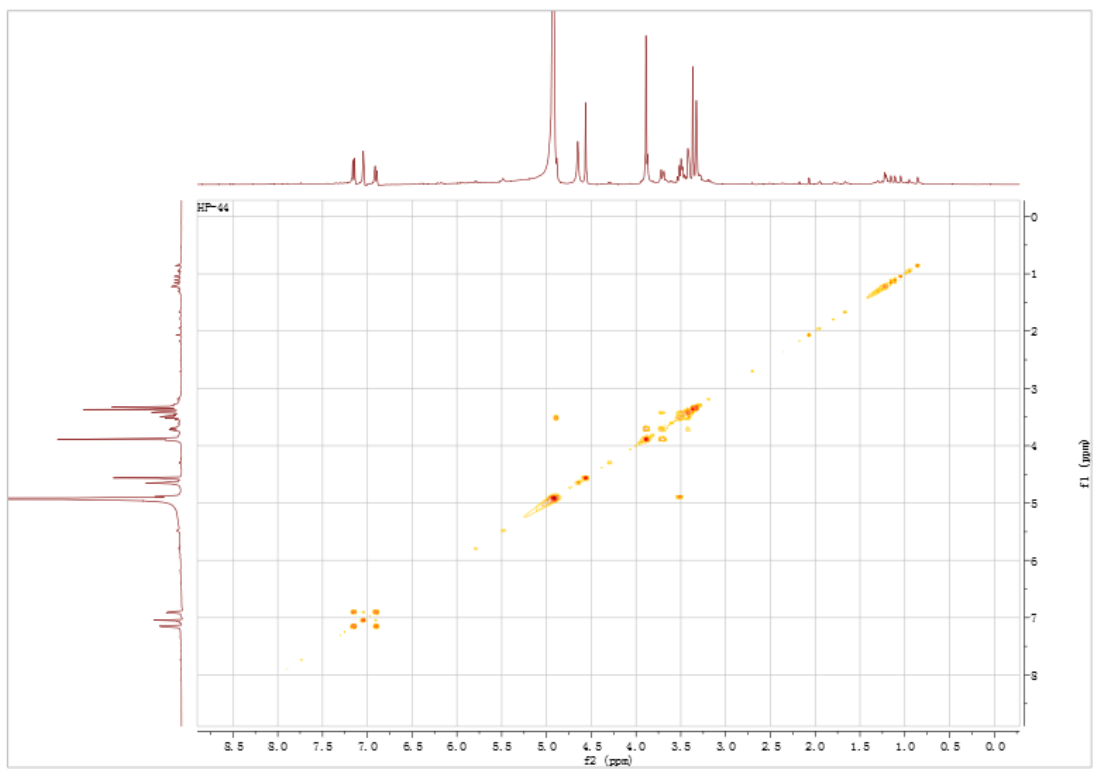

SI 13:  $^1\text{H}$ - $^1\text{H}$  COSY spectrum of compound **4**.

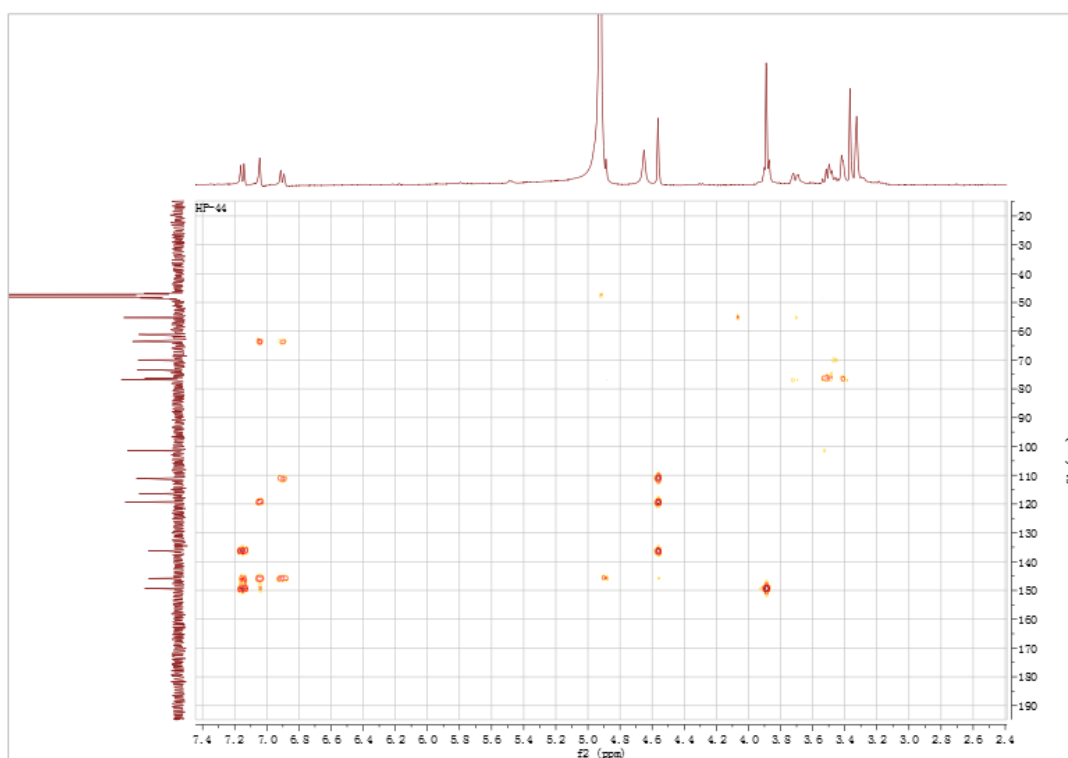

SI 14: HMBC spectrum of compound **4**

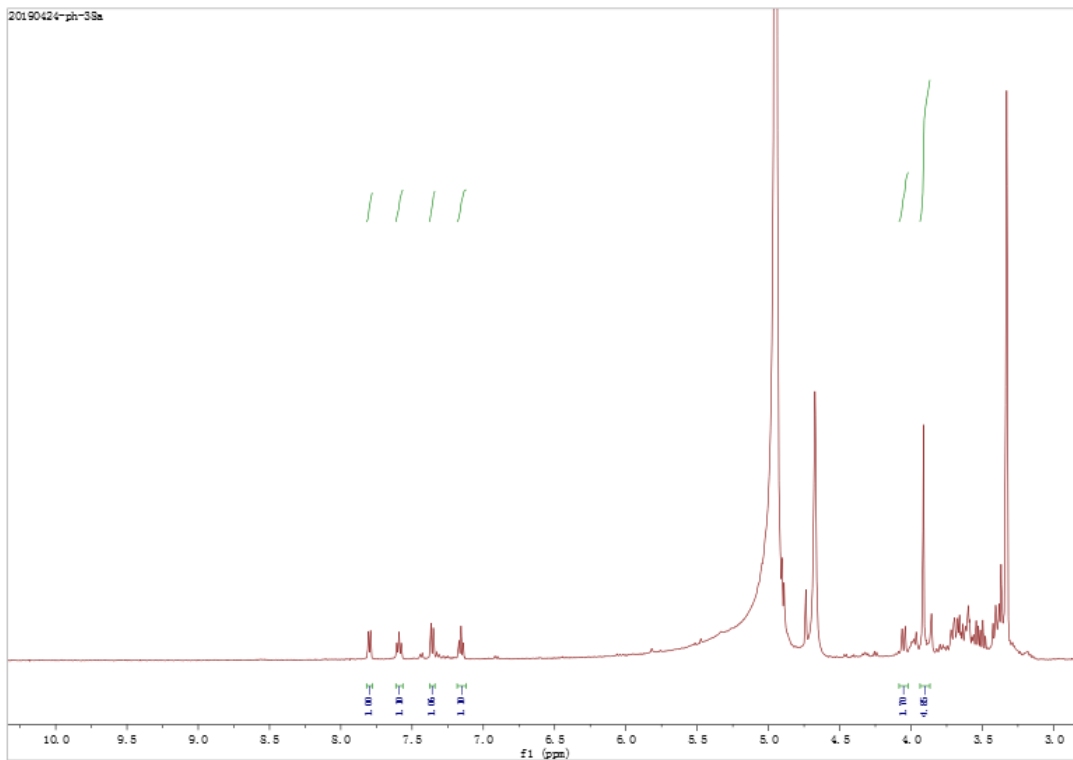

SI 15:  $^1\text{H}$ -NMR spectrum of compound **5**.

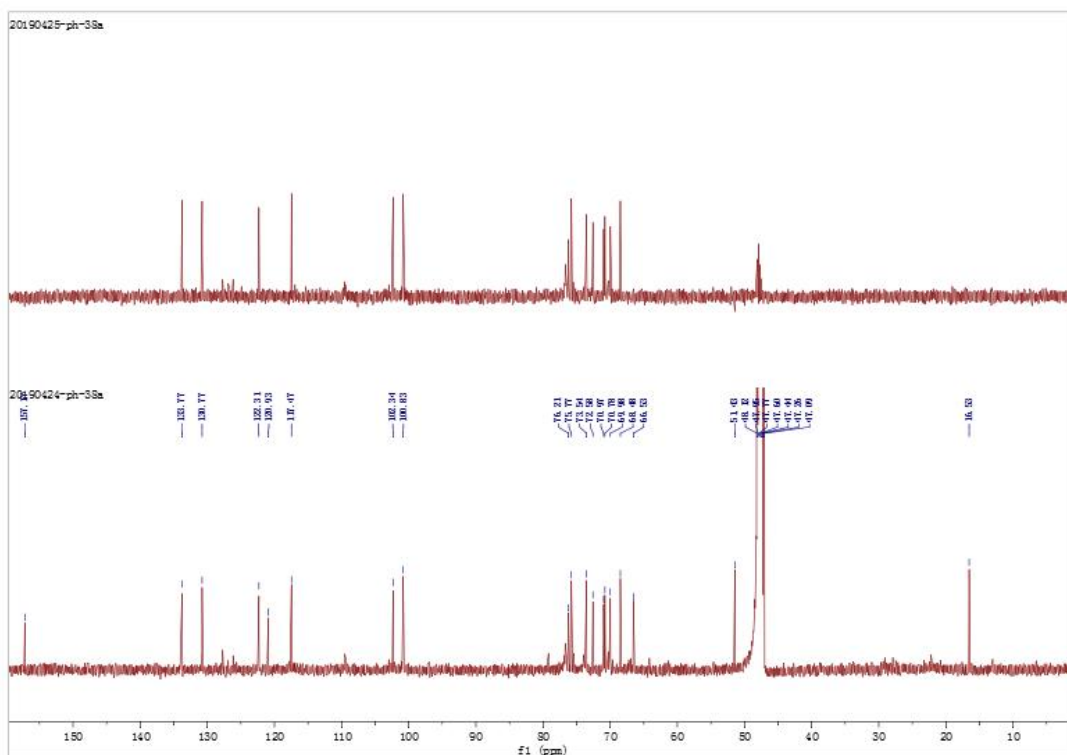

SI 16:  $^{13}\text{C}$ -NMR and DEPT spectrum of compound **5**.

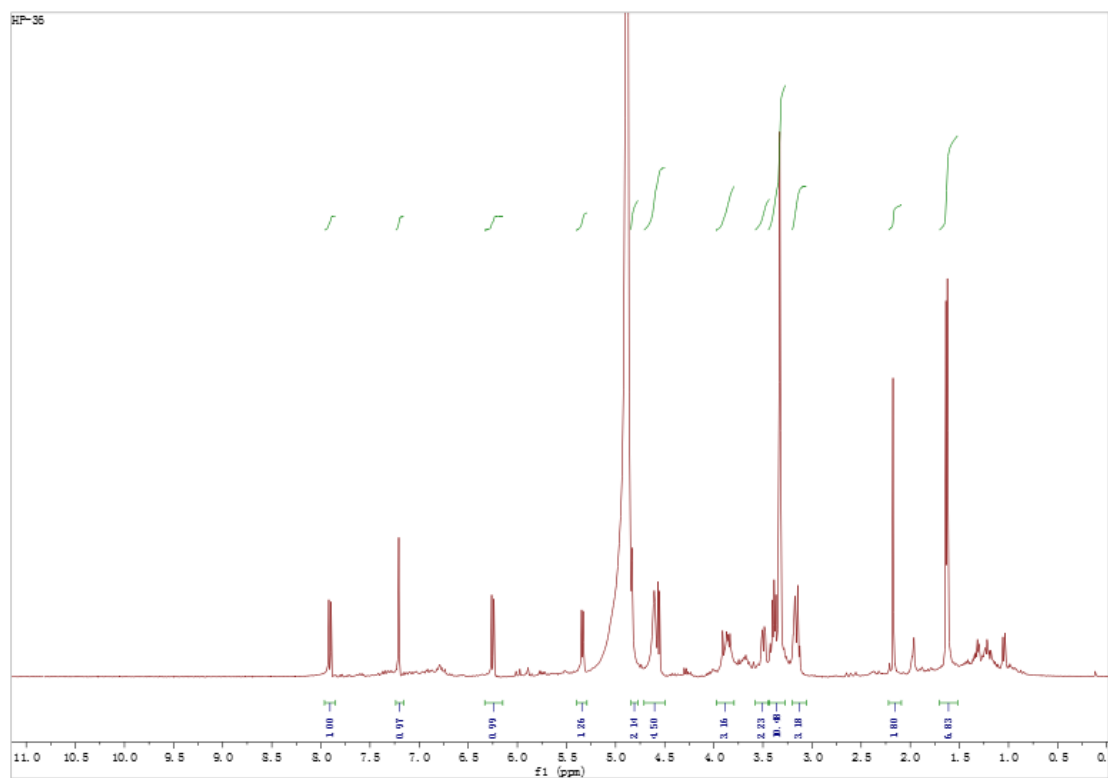

SI 17:  $^1\text{H}$ -NMR spectrum of compound **6**.

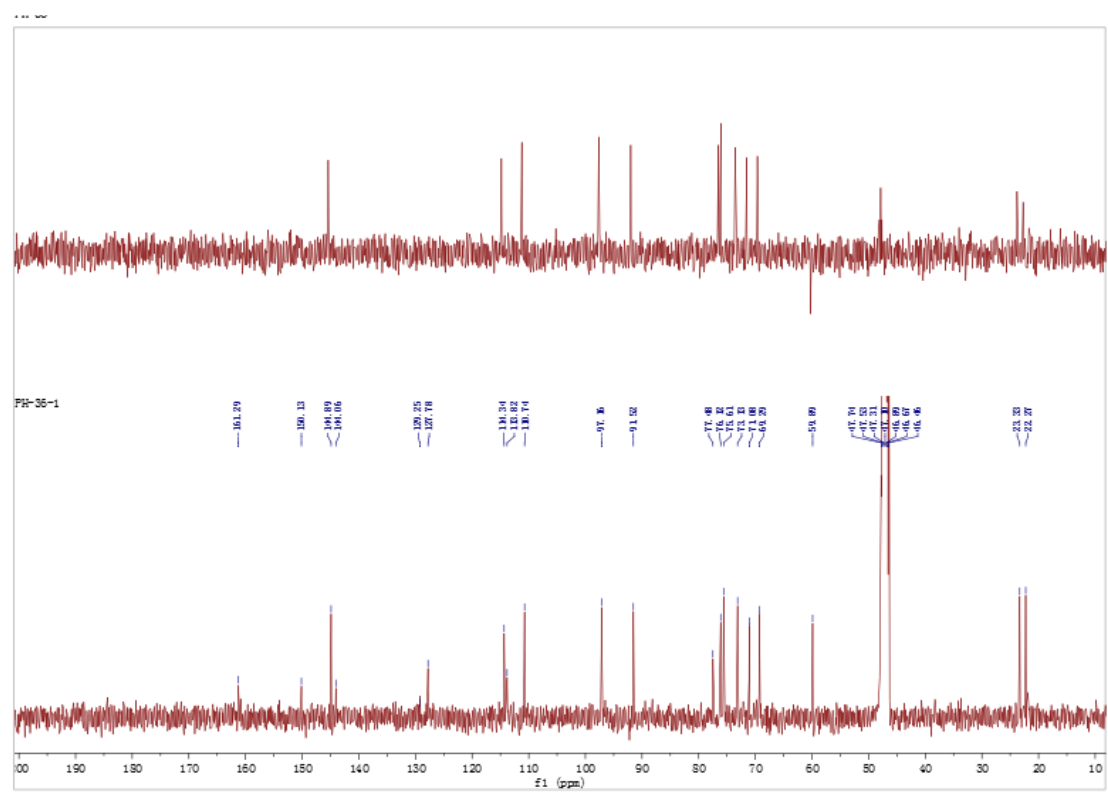

SI 18:  $^{13}\text{C}$ -NMR and DEPT spectrum of compound **6**.

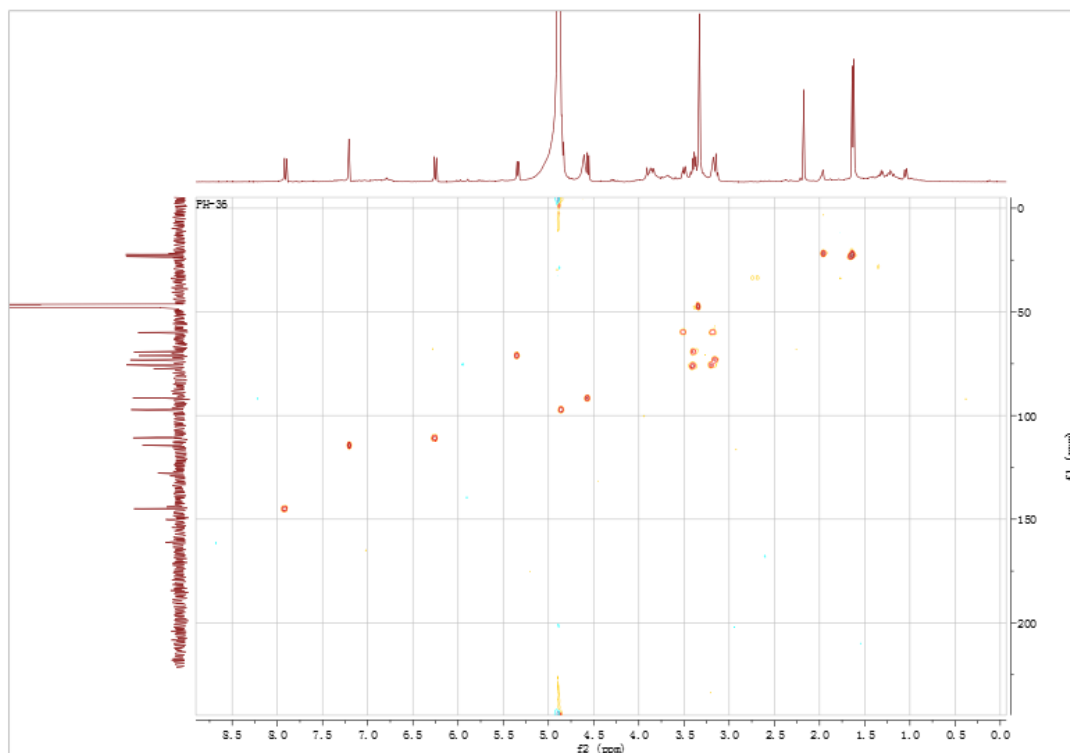

SI 19: HSQC spectrum of compound **6**.

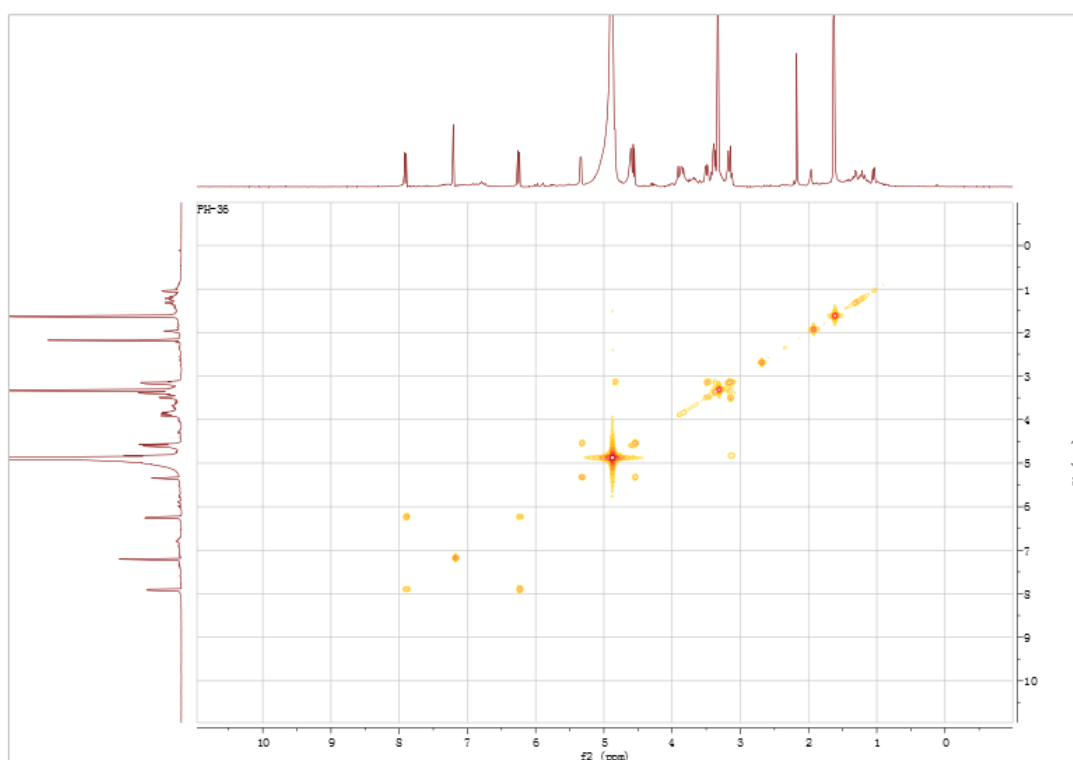

SI 20:  $^1\text{H}$ - $^1\text{H}$  COSY spectrum of compound **6**.

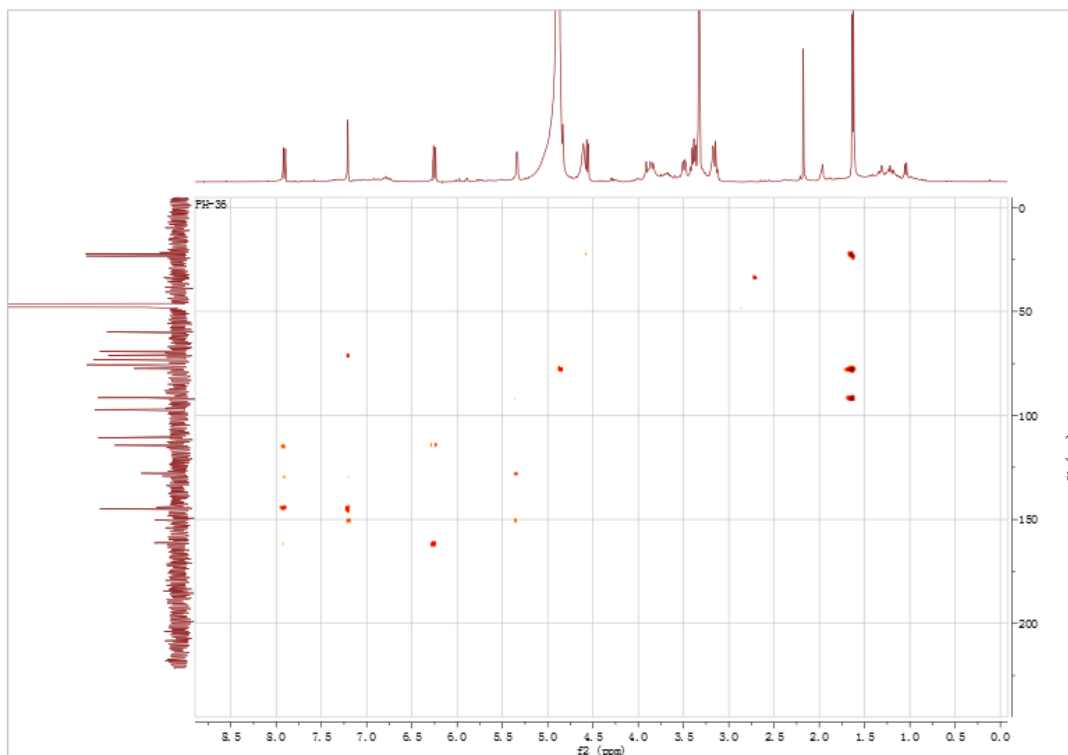

SI 21: HMBC spectrum of compound **6**

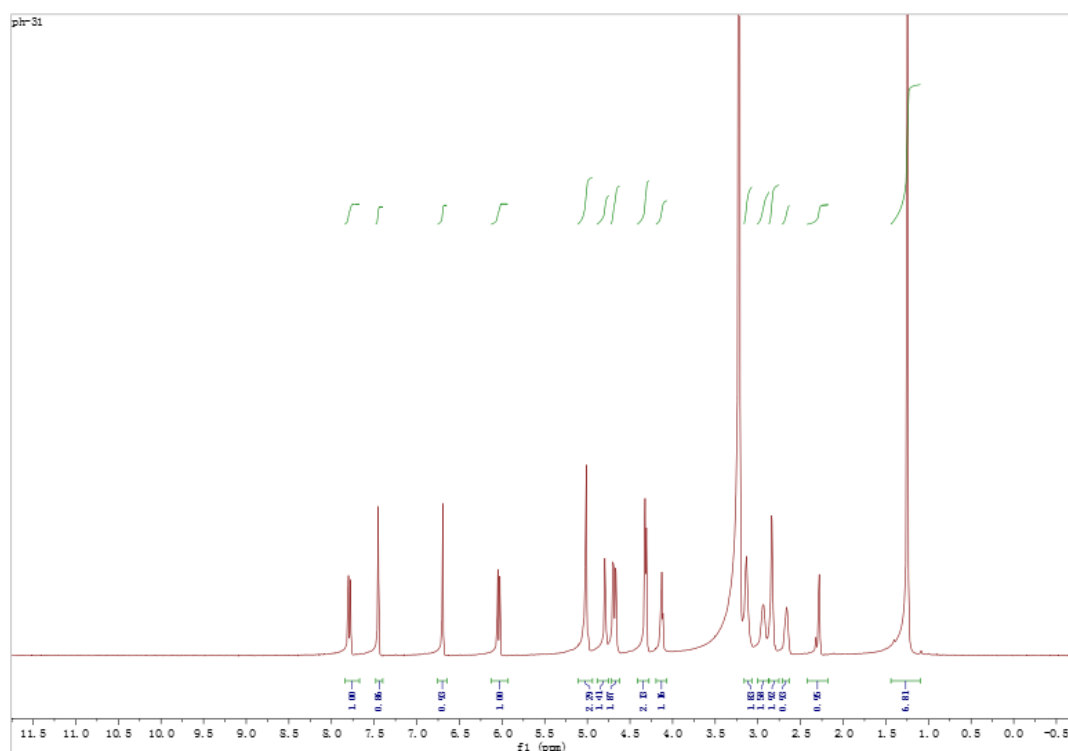

SI 22:  $^1\text{H-NMR}$  spectrum of compound **7**.

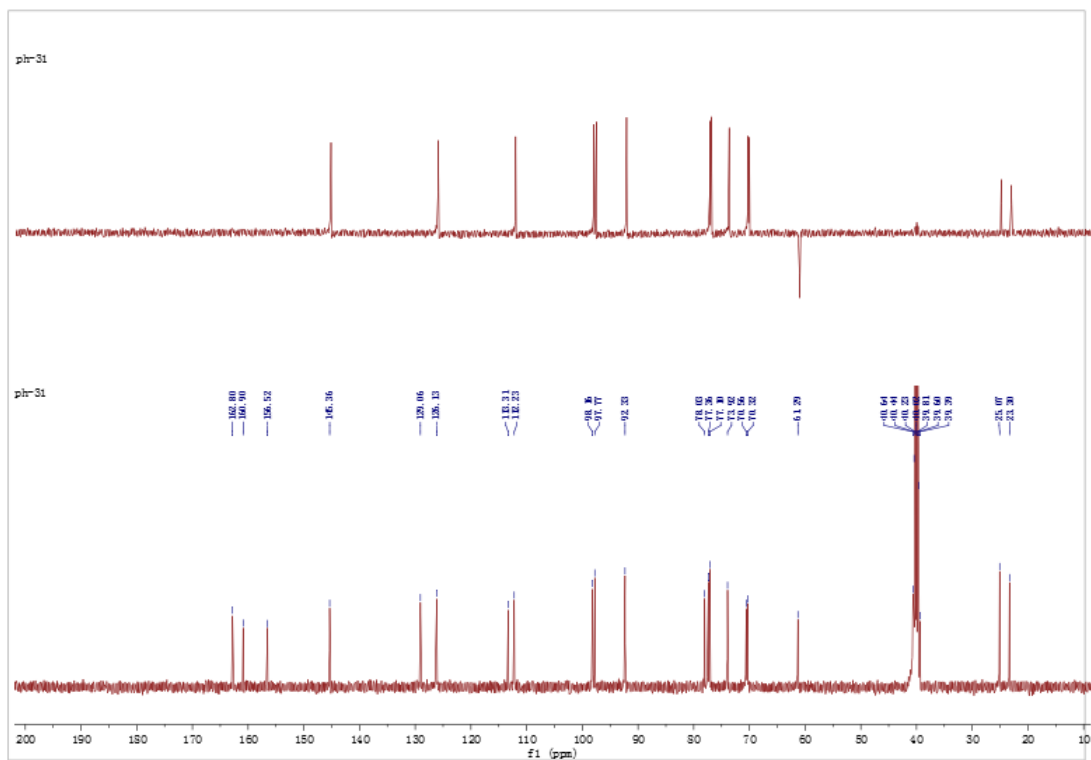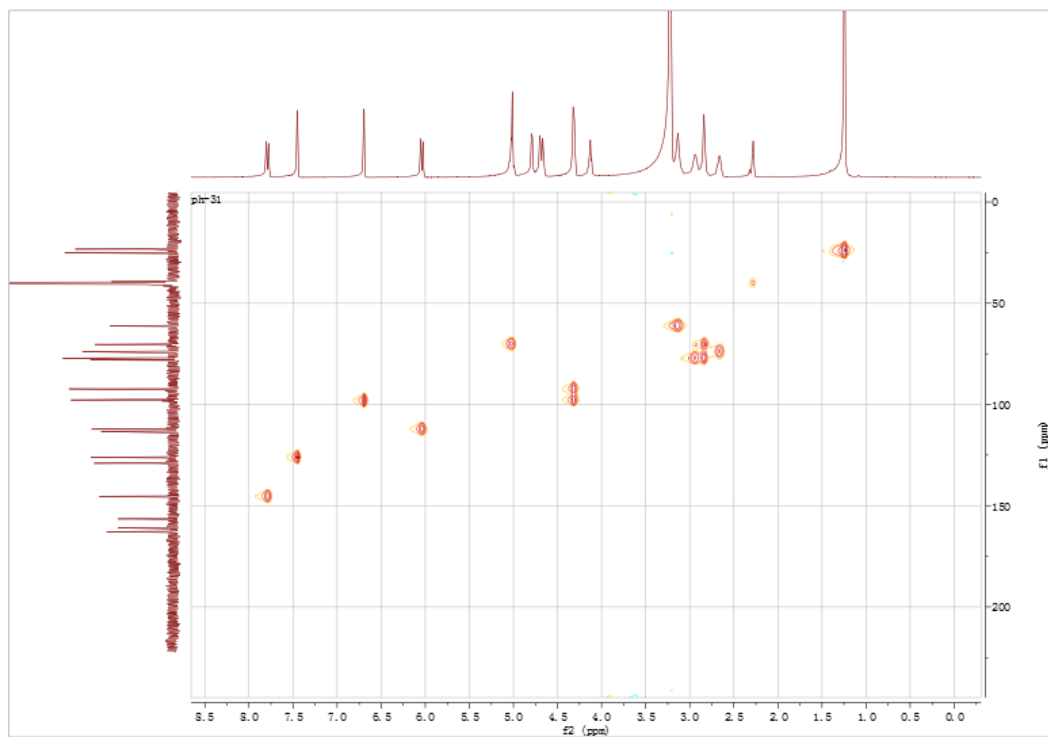

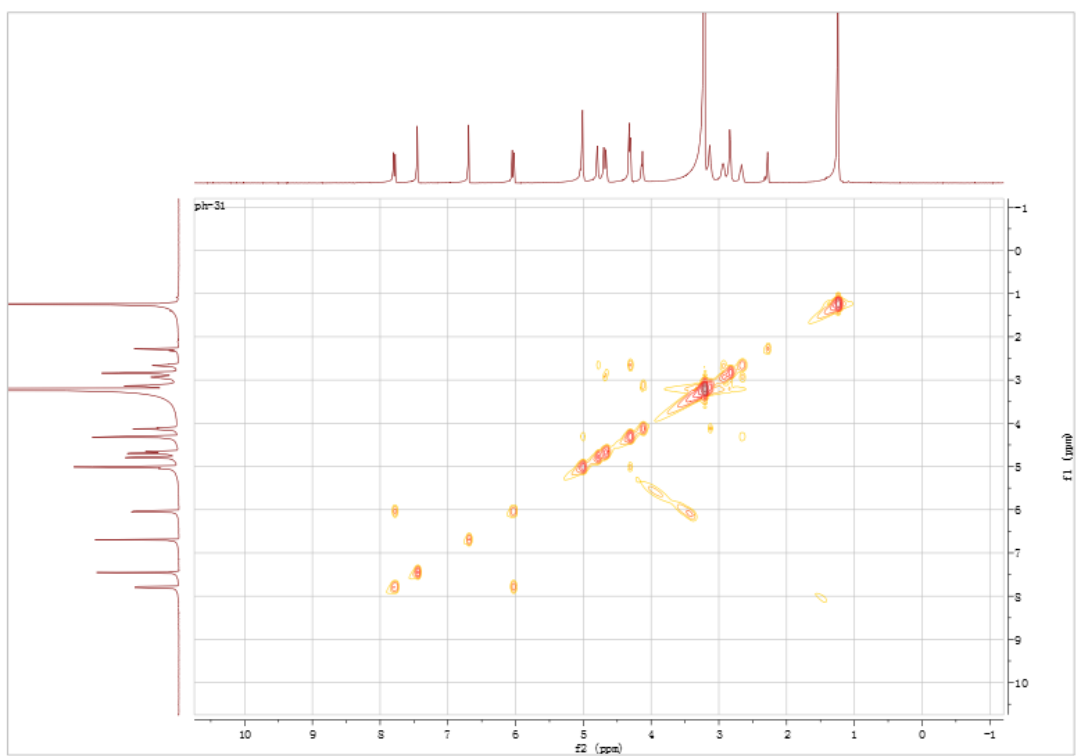

SI 25:  $^1\text{H}$ - $^1\text{H}$  COSY spectrum of compound **7**.

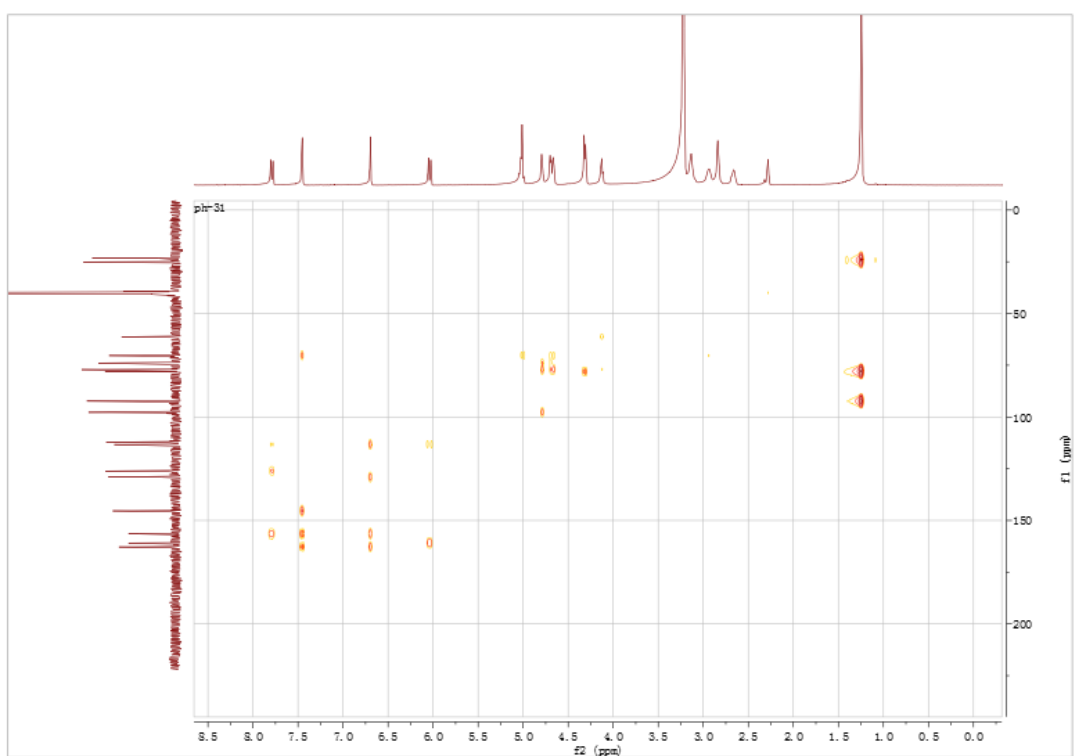

SI 26: HMBC spectrum of compound **7**



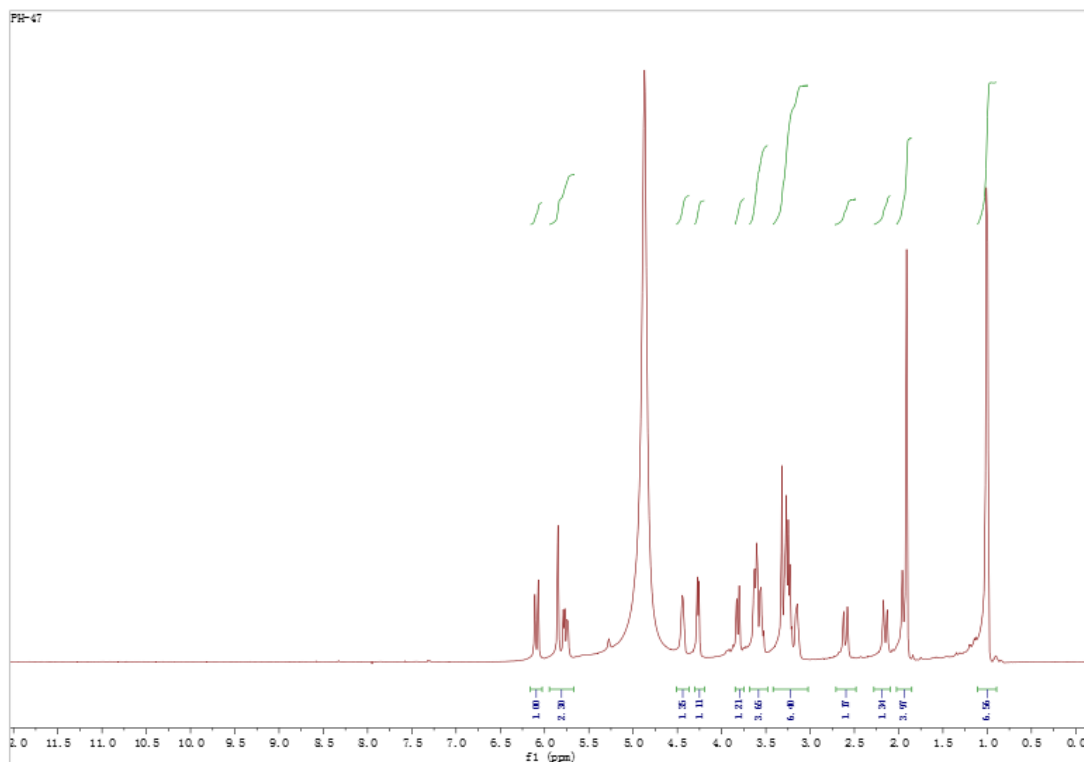

SI 27:  $^1\text{H}$ -NMR spectrum of compound **8**.

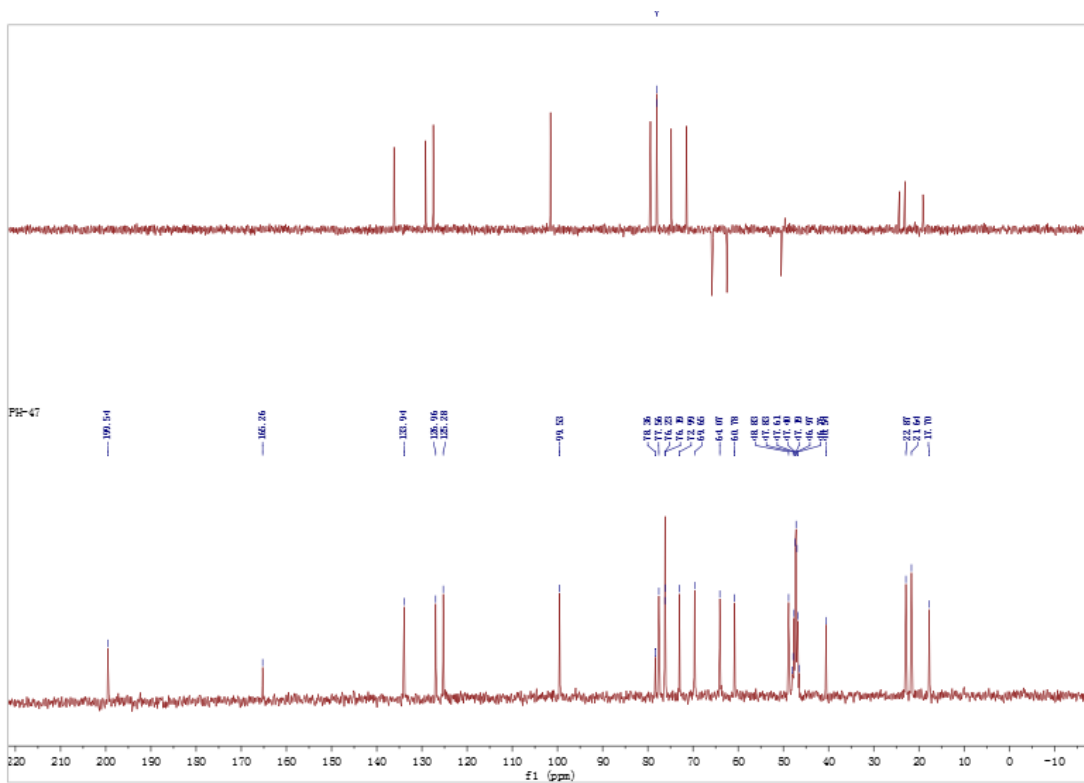

SI 28:  $^{13}\text{C}$ -NMR and DEPT spectrum of compound **8**.

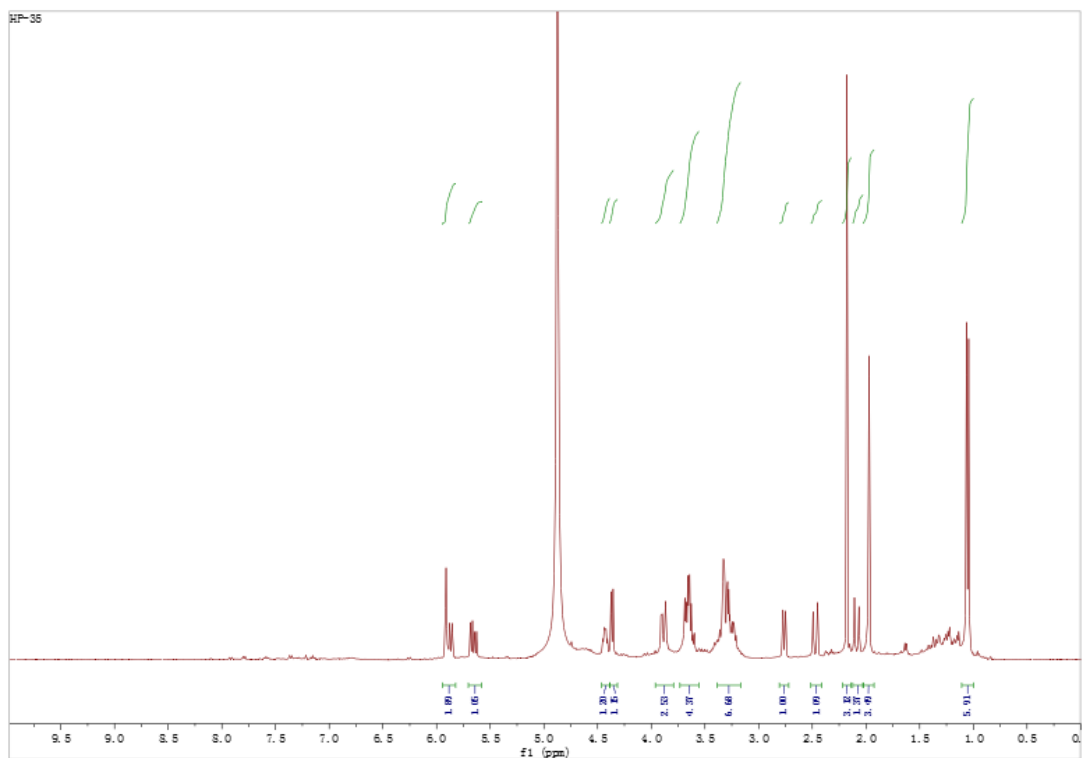

SI 29:  $^1\text{H}$ -NMR spectrum of compound **9**.

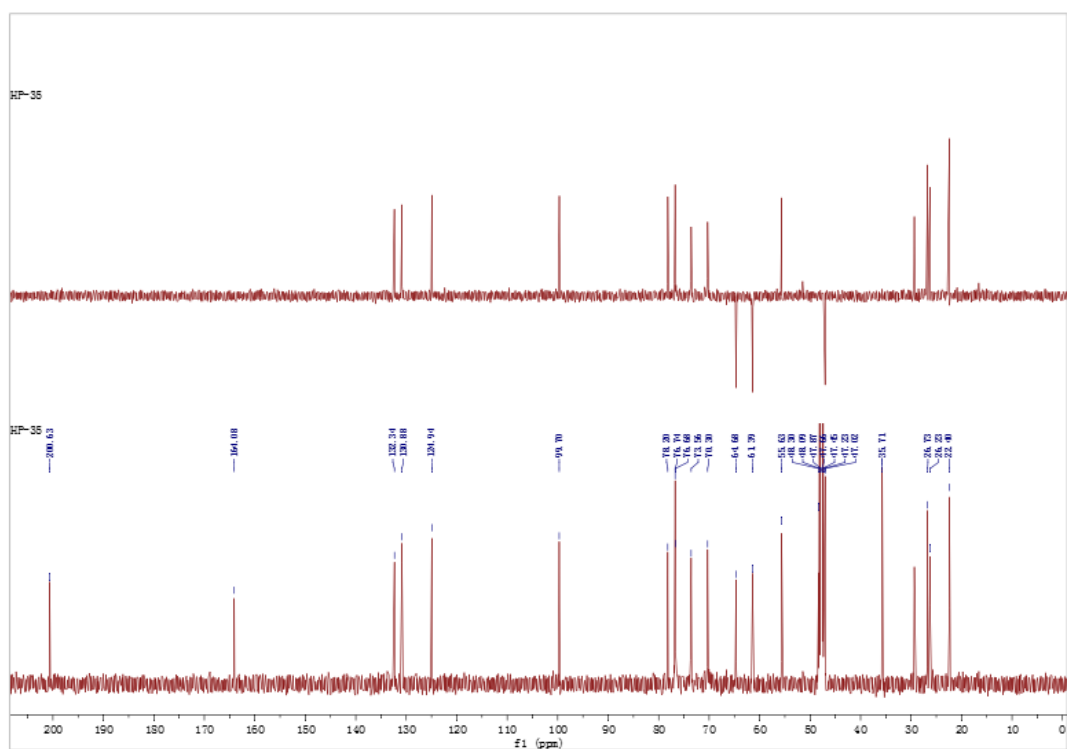

SI 30:  $^{13}\text{C}$ -NMR and DEPT spectrum of compound **9**.

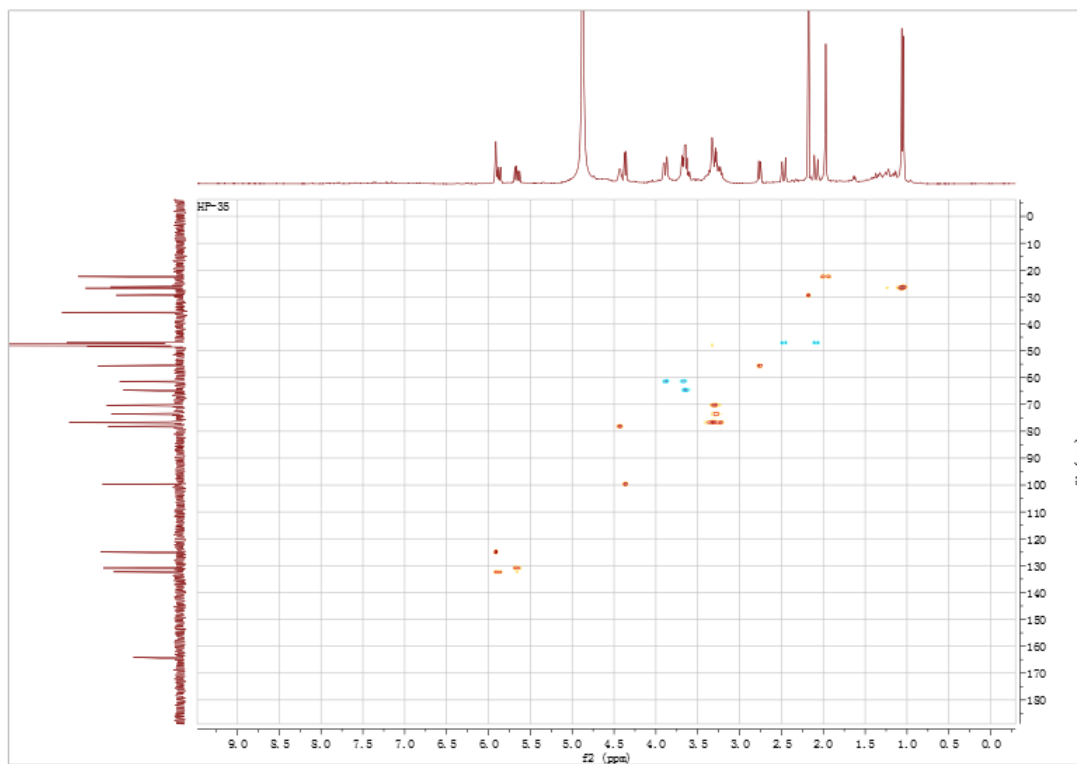

SI 31: HSQC spectrum of compound **9**.

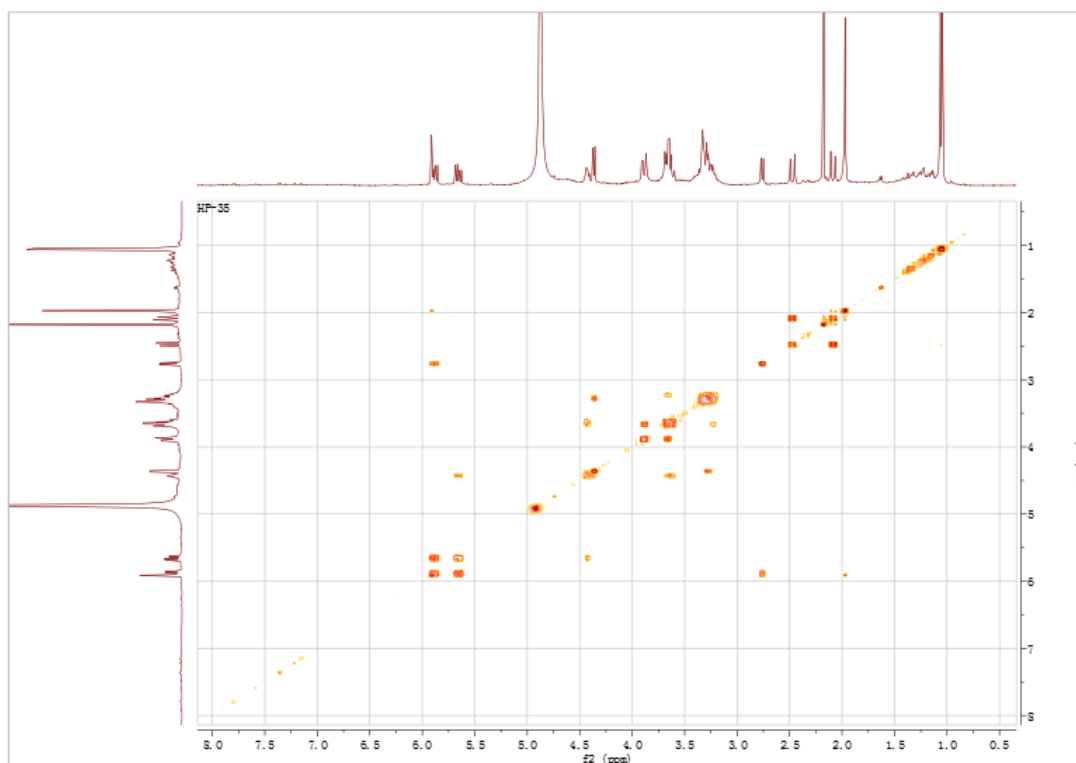

SI 32:  $^1\text{H}$ - $^1\text{H}$  COSY spectrum of compound **9**.

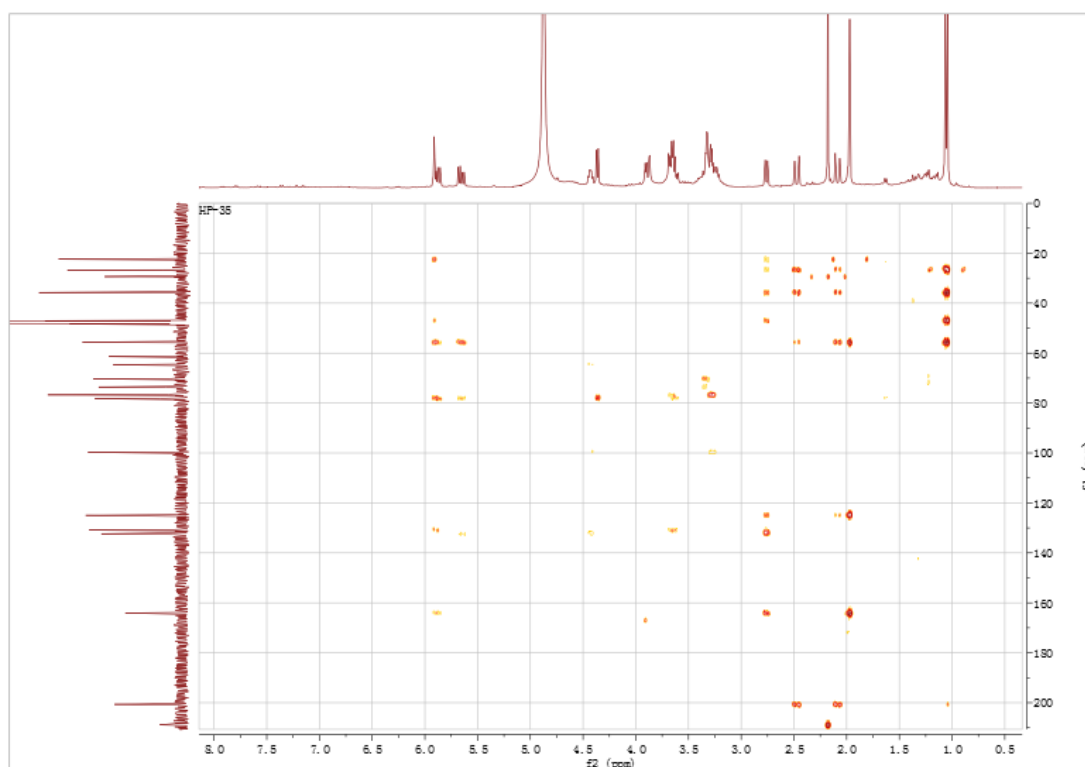

SI 33: HMBC spectrum of compound **9**

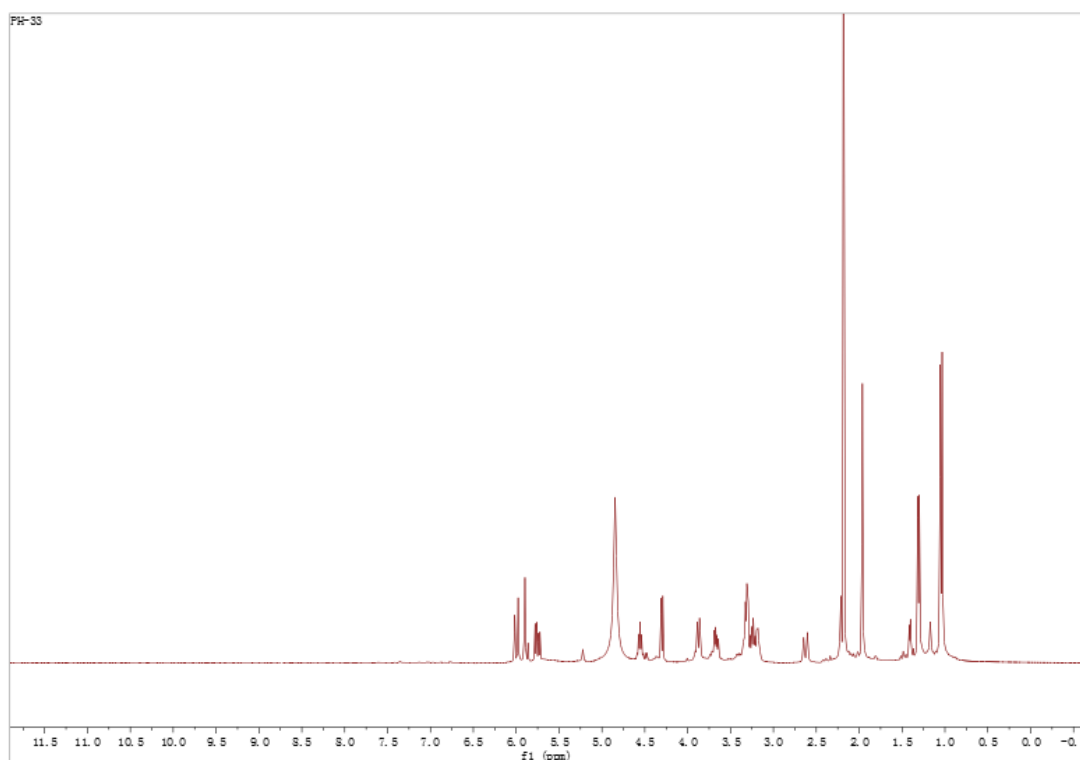

SI 34: <sup>1</sup>H-NMR spectrum of compound **10**.

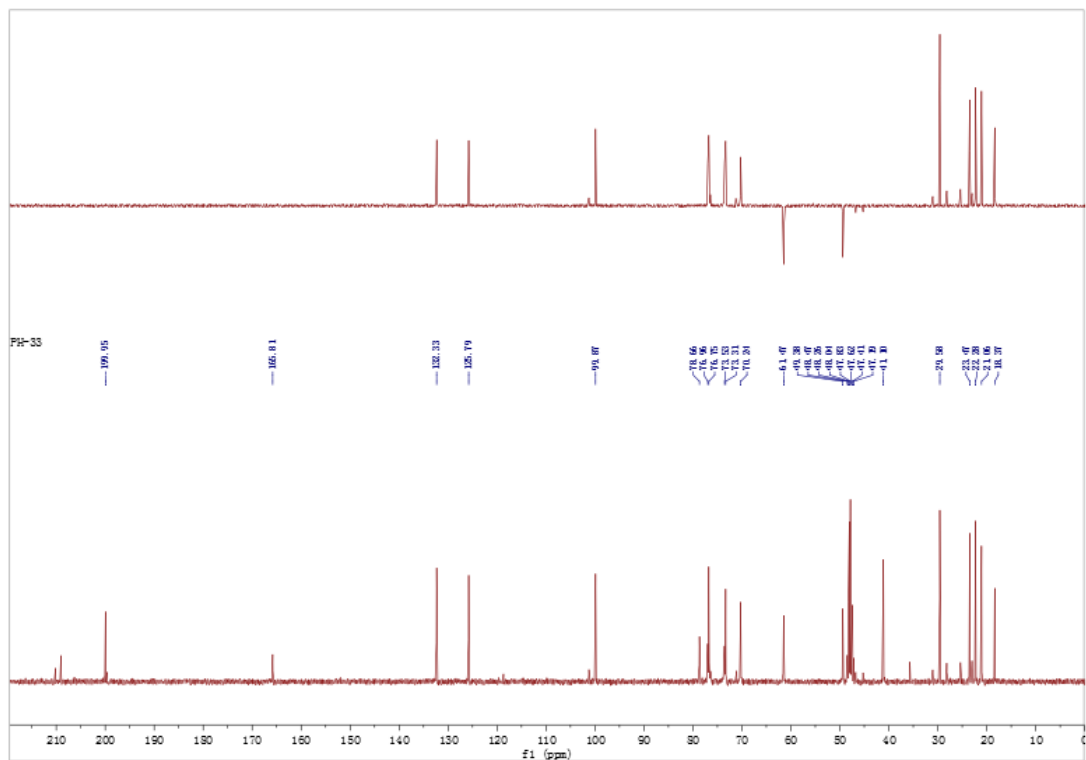

SI 35:  $^{13}\text{C}$ -NMR and DEPT spectrum of compound **10**.

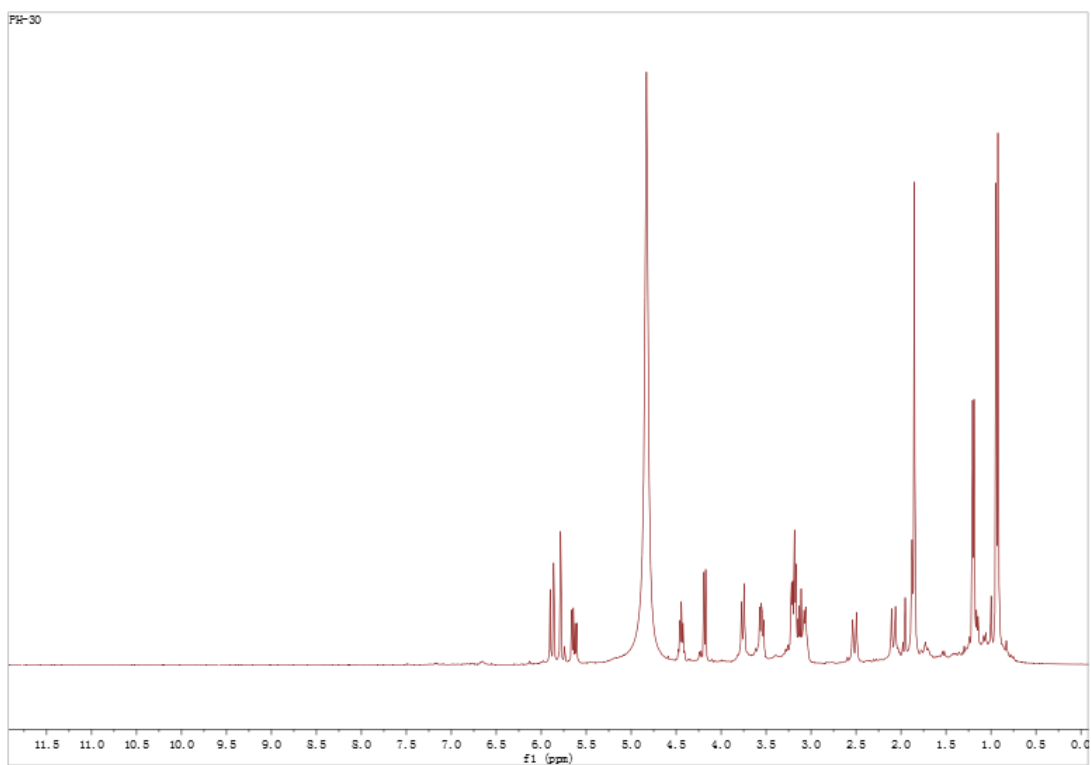

SI 36:  $^1\text{H}$ -NMR spectrum of compound **11**.

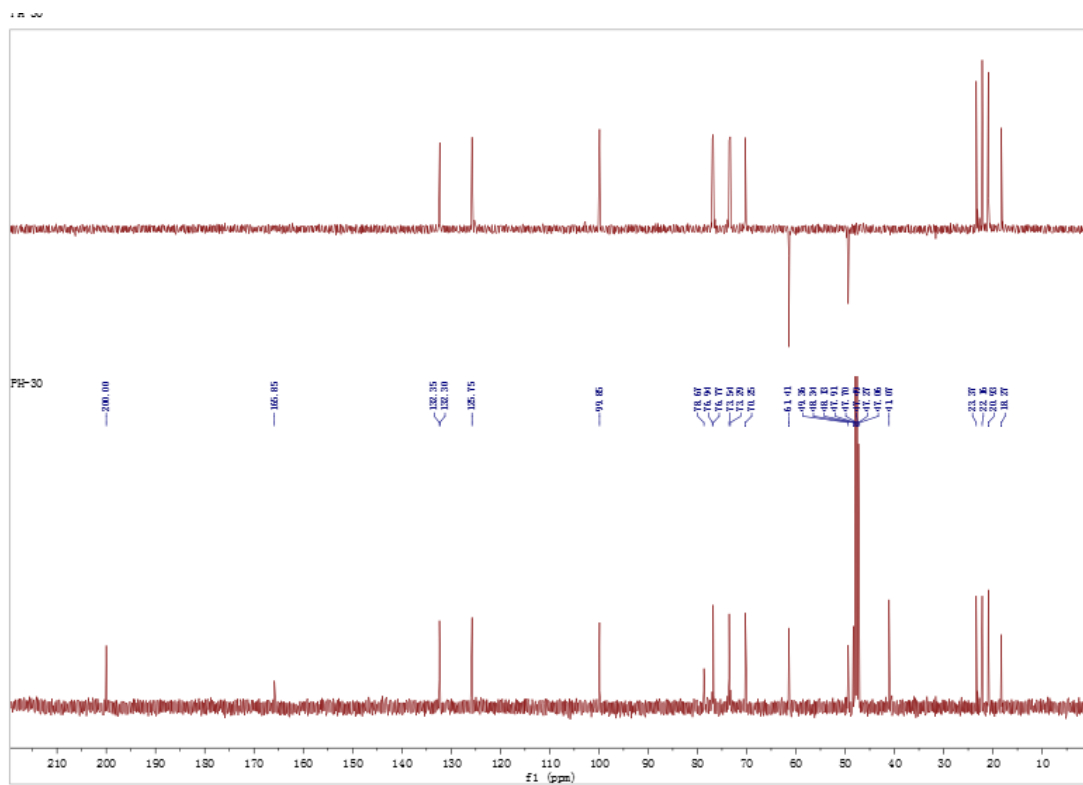

SI 37:  $^{13}\text{C}$ -NMR and DEPT spectrum of compound **11**.

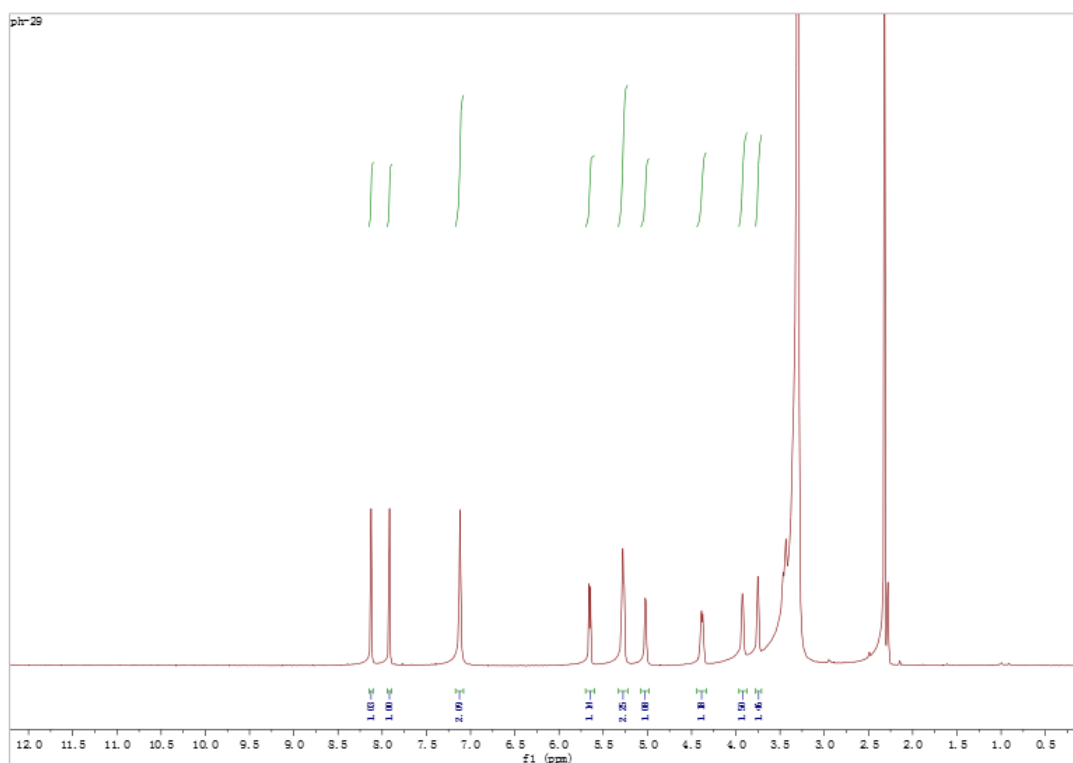

SI 38:  $^1\text{H}$ -NMR spectrum of compound **12**.

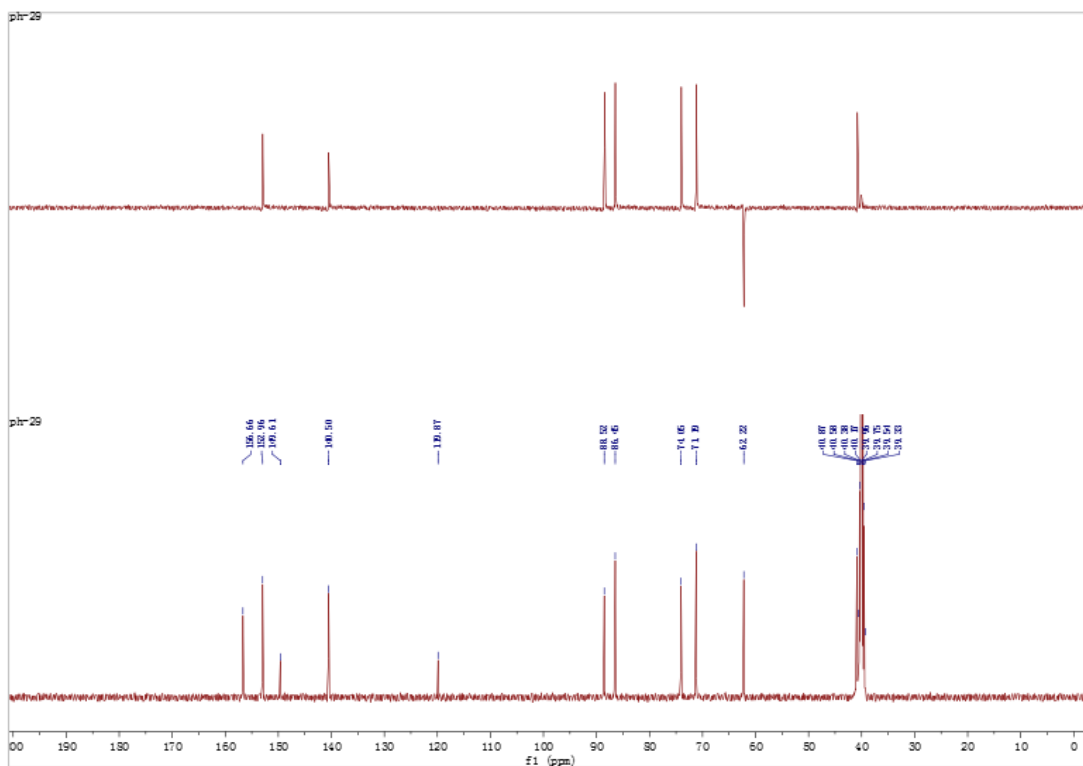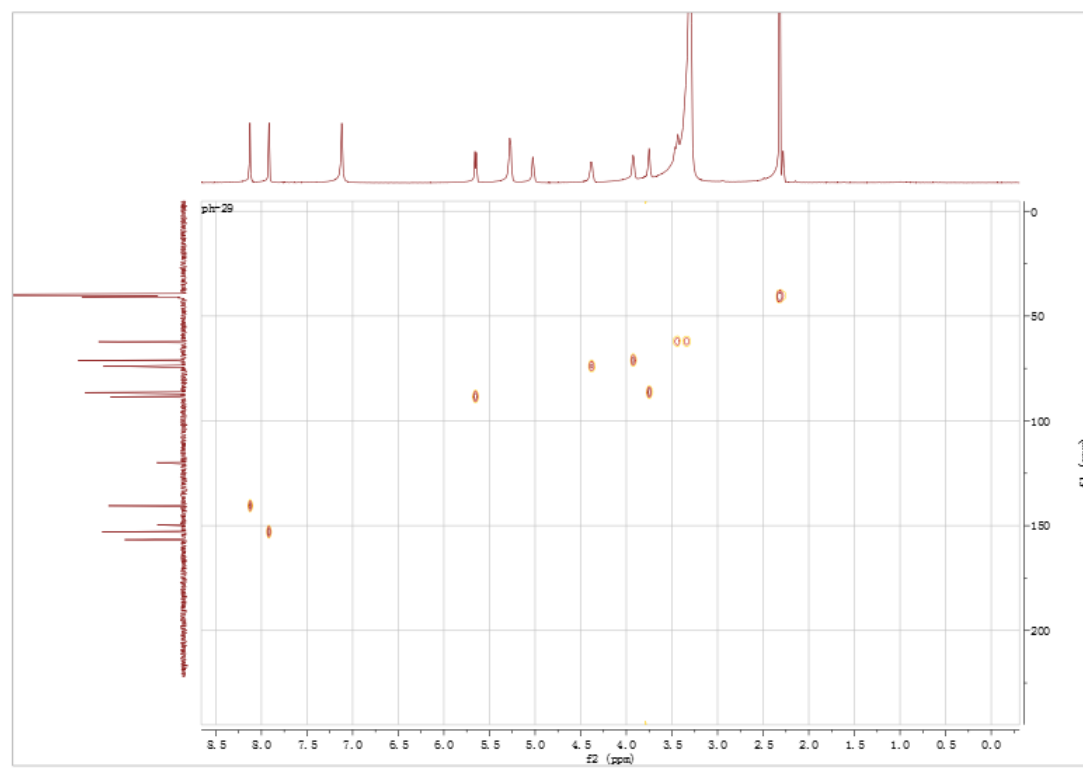

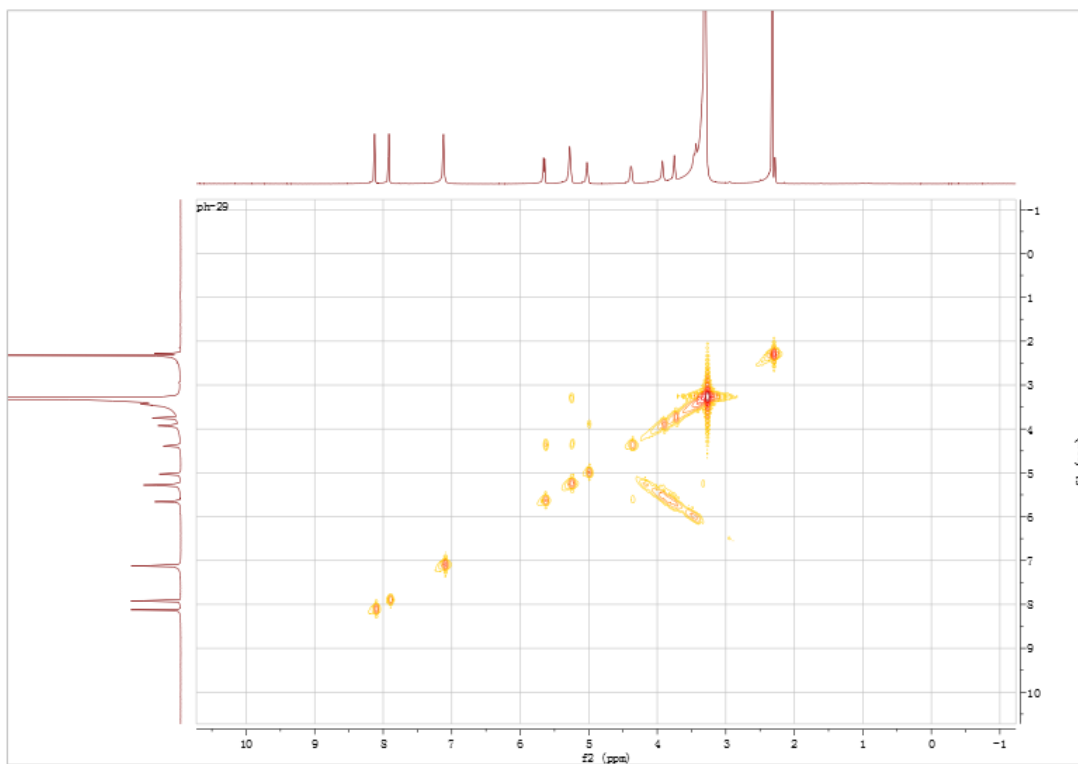

SI 41:  $^1\text{H}$ - $^1\text{H}$  COSY spectrum of compound **12**.

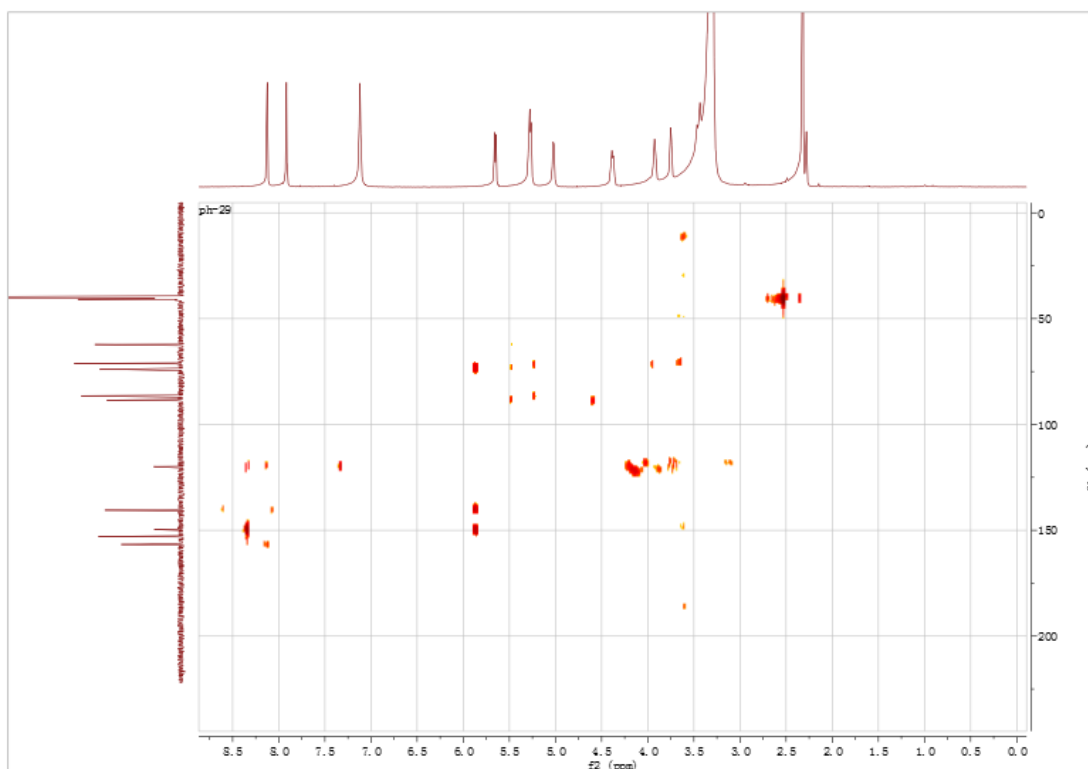

SI 42: HMBC spectrum of compound **12**.
